# Supplementary material for: Solid-phase reactive chromatography (SPRC): a sustainable method for the synthesis of benzimidazol-diphenyl-2-imino-thiazolidine-4-ols (hemiaminals) which are active against lung cancer
Source: Royal Society of Chemistry journal article supplement (doi:10.1039/d0ra09082d), 2021-01-01
Supplement: d0ra09082d1.pdf [file d0ra09082d1.pdf]

### Characteristic Data

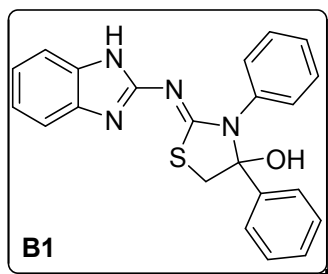

2-(1H-benzo[d]imidazol-2-ylimino)-3,4-diphenylthiazolidin-4-ol

White solid, yield: 80%, **Mp**: 145-147 °C.

**Rf**: 0.43 (EtOAc/Hexane: 30/70, UV light and *p*-anisaldehyde solution).

**<sup>1</sup>H NMR (300 MHz, CDCl<sub>3</sub>)** δ (ppm) 10.01 (bs, 1H), 7.73-7.65 (m, 4H), 7.55-7.51 (m, 2H), 7.41-7.40 (m, 3H), 7.31 (t, *J* = 7.55 Hz, 2H), 7.19-7.16 (m, 2H), 7.00 (t, *J* = 7.36 Hz, 2H). **<sup>13</sup>C NMR (125 MHz, CDCl<sub>3</sub> + DMSO-*D*<sub>6</sub>)** δ (ppm) 165.02, 154.98, 140.60, 138.60, 136.74, 128.69, 128.27, 127.75, 127.52, 126.23, 121.11, 120.68, 113.21, 44.13. **HRMS (ESI)** calcd. for C<sub>22</sub>H<sub>18</sub>N<sub>4</sub>OS+H<sup>+</sup>: 387.1201, found: 387.1268.

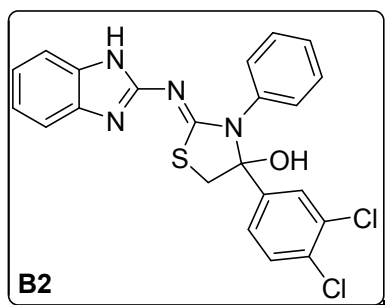

2-(1H-benzo[d]imidazol-2-ylimino)-4-(3,4-dichlorophenyl)-3-phenylthiazolidin-4-ol

White solid, yield: 76%, **Mp**: 136-138 °C.

**Rf**: 0.45 (EtOAc/Hexane: 30/70, UV light and *p*-anisaldehyde solution).

**<sup>1</sup>H NMR (300 MHz, CDCl<sub>3</sub>)** δ (ppm) 7.80 (s, 1H), 7.68-7.64 (m, 2H), 7.44 (d, *J* = 8.49 Hz, 1H), 7.34-7.28 (m, 4H), 7.22 (t, *J* = 7.17 Hz, 1H), 7.13 (t, *J* = 6.79 Hz, 1H), 7.00-6.97 (m, 2H), 3.72 (d, *J* = 12.08 Hz, 1H), 3.55 (d, *J* = 11.89 Hz, 1H). **<sup>13</sup>C NMR (125 MHz, CDCl<sub>3</sub> + DMSO-*D*<sub>6</sub>)** δ (ppm) 157.63, 144.19, 142.33, 138.57, 137.06, 133.95, 133.40, 130.68, 130.17, 129.40, 128.60, 128.13, 125.50, 124.76, 122.58, 122.30, 114.30, 141.22. **HRMS (ESI)** calcd. for C<sub>22</sub>H<sub>16</sub>Cl<sub>2</sub>N<sub>4</sub>OS+H<sup>+</sup>: 387.1201, found: 387.1268.

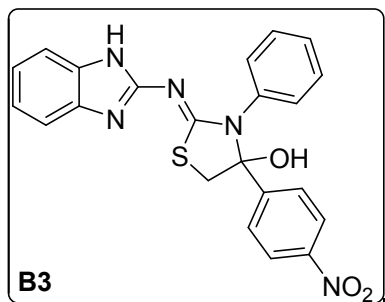

2-(1H-benzo[d]imidazol-2-ylimino)-4-(4-nitrophenyl)-3-phenylthiazolidin-4-ol

Yellow solid, yield: 89%, **Mp**: 111-113 °C.

**Rf**: 0.33 (EtOAc/Hexane: 70/30, UV light and *p*-anisaldehyde solution).

**<sup>1</sup>H NMR (300 MHz, CDCl<sub>3</sub>)** δ (ppm) 8.23 (d, *J* = 8.90 Hz, 2H), 7.76 (d, *J* = 8.90 Hz, 2H), 7.42-7.35 (m, 4H), 7.22 (t, *J* = 7.91 Hz, 1H), 7.14-7.10 (m, 4H), 3.6 (br s, 2H). **<sup>13</sup>C NMR (125 MHz, CDCl<sub>3</sub>+ DMSO-*D*<sub>6</sub>)** δ (ppm) 164.38, 154.90, 148.51, 146.81, 143.54, 138.35, 137.21, 128.72, 127.94, 127.57, 126.49, 122.57, 120.38, 113.19, 43.59. **HRMS (ESI)** calcd. for C<sub>22</sub>H<sub>17</sub>N<sub>5</sub>O<sub>3</sub>S+H<sup>+</sup>: 432.1124, found: 432.1109.

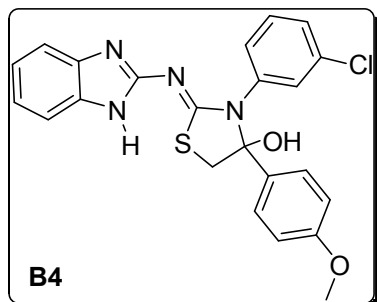

2-(1H-benzo[d]imidazol-2-ylimino)-3-(3-chlorophenyl)-4-(4-methoxyphenyl)thiazolidin-4-ol

White solid, yield: 72%, **Mp**: 91-93 °C..

**Rf**: 0.45 (EtOAc/Hexane: 70/30, UV light and *p*-anisaldehyde solution).

**<sup>1</sup>H NMR (300 MHz, CDCl<sub>3</sub>)** δ (ppm) 8.01 (br s, 1H), 7.69 (s, 1H), 7.45 (d, *J* = 7.97 Hz, 1H), 7.37 (br m, 3H), 7.28-7.05 (m, 5H), 6.99-6.93 (m, 1H), 7.77 (d, *J* = 8.08 Hz, 1H), 4.67 (br s, 1H), 3.75 (s, 3H), 3.57 (d, *J* = 11.74 Hz, 1H). **<sup>13</sup>C NMR (125 MHz, CDCl<sub>3</sub> + DMSO-*D*<sub>6</sub>)** δ (ppm) 164.20, 158.34, 154.41, 139.65, 129.63, 129.30, 128.34, 127.06, 126.64, 125.80, 125.19, 124.46, 120.70, 120.16, 113.08, 112.48, 54.68, 43.63. **HRMS (ESI)** calcd. for C<sub>23</sub>H<sub>19</sub>ClN<sub>4</sub>O<sub>2</sub>S+H<sup>+</sup>: 451.0990, found: 451.0991.

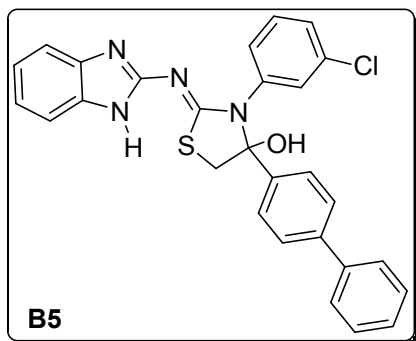

2-(1H-benzo[d]imidazol-2-ylimino)-4-(biphenyl-4-yl)-3-(3-chlorophenyl)thiazolidin-4-ol

White solid, yield: 78%, **Mp**: 109-111 °C.

**Rf**: 0.38 (EtOAc/Hexane: 30/70, UV light and *p*-anisaldehyde solution).

**<sup>1</sup>H NMR (300 MHz, CDCl<sub>3</sub>)** δ (ppm) 7.69-7.59 (m, 3H), 7.55-7.49 (m, 3H), 7.42-7.41 (m, 5H), 7.33-7.32 (m, 1H), 7.27-7.25 (m, 1H), 7.14-7.09 (m, 4H). **<sup>13</sup>C NMR (125 MHz, CDCl<sub>3</sub> + DMSO-*D*<sub>6</sub>)** δ (ppm) 164.64, 154.48, 139.93, 139.65, 139.27, 136.58, 132.58, 128.59, 128.29, 128.09, 126.81, 126.46, 126.17, 125.92, 120.50, 113.05, 43.84. **HRMS (ESI)** calcd. for C<sub>28</sub>H<sub>21</sub>ClN<sub>4</sub>OS+H<sup>+</sup>: 497.1197, found: 497.1175.

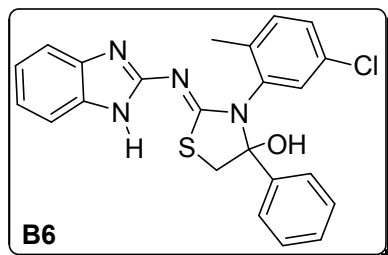

2-(1H-benzo[d]imidazol-2-ylimino)-3-(5-chloro-2-methylphenyl)-4-phenylthiazolidin-4-ol

White solid, yield: 45%, **Mp**: 124-126 °C.

**Rf**: 0.47 (EtOAc/Hexane: 30/70, UV light and *p*-anisaldehyde solution).

**<sup>1</sup>H NMR (300 MHz, CDCl<sub>3</sub>)** δ (ppm) 7.70 (s, 2H), 7.43-7.36 (m, 5H), 7.25-7.12 (m, 5H), 3.93 (br s, 1H), 2.29 (s, 3H). **<sup>13</sup>C NMR (125 MHz, CDCl<sub>3</sub> + DMSO-*D*<sub>6</sub>)** δ (ppm) 159.60, 150.06, 140.13, 133.74, 131.72, 130.58, 128.84, 128.67, 128.14, 128.00, 127.63, 126.32, 125.96, 123.64, 122.01, 113.85, 40.43, 17.58. **HRMS (ESI)** calcd. for C<sub>23</sub>H<sub>19</sub>ClN<sub>4</sub>OS+H<sup>+</sup>: 435.1040, found: 435.1022.

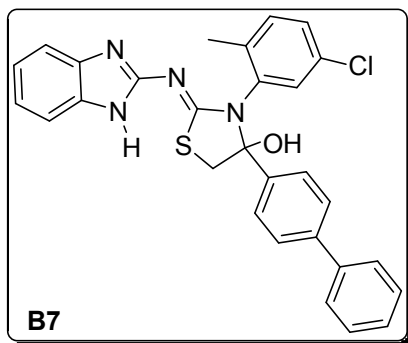

2-(1H-benzo[d]imidazol-2-ylimino)-4-(biphenyl-4-yl)-3-(5-chloro-2-methylphenyl)thiazolidin-4-ol

White solid, yield: 75%, **Mp**: 141-143 °C.

**Rf**: 0.50 (EtOAc/Hexane: 30/70, UV light and *p*-anisaldehyde solution).

**<sup>1</sup>H NMR (300 MHz, CDCl<sub>3</sub>)** δ (ppm) 7.83 (s, 1H), 7.65 (d, J = 8.23 Hz, 2H), 7.59 (d, J = 7.31 Hz, 2H), 7.45 (t, J = 7.70 Hz, 2H), 7.40-7.36 (m 3H), 7.22-7.14 (m, 6H), 4.07 (br s, 1H), 2.30 (s, 3H). **<sup>13</sup>C NMR (125 MHz, CDCl<sub>3</sub> + DMSO-*D*<sub>6</sub>)** δ (ppm) 159.71, 150.30, 143.59, 139.91, 131.75, 129.50, 128.97, 128.85, 128.45, 127.89, 127.33, 127.11, 126.98, 126.06, 123.92, 122.03, 113.83, 40.33, 17.64. **HRMS (ESI)** calcd. for C<sub>23</sub>H<sub>19</sub>ClN<sub>4</sub>OS+H<sup>+</sup>: 511.1353, found: 511.1335.

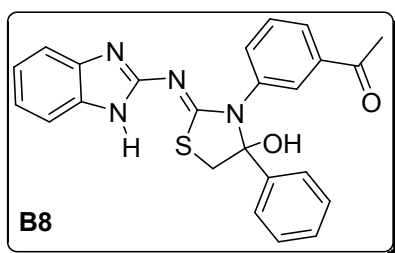

1-(3-(2-(1H-benzo[d]imidazol-2-ylimino)-4-hydroxy-4-phenylthiazolidin-3-yl)phenyl)ethanone  
White solid, yield: 30%, **Mp**: 82-84 °C.

**Rf**: 0.34 (EtOAc/Hexane: 70/30, UV light and *p*-anisaldehyde solution).

**<sup>1</sup>H NMR (300 MHz, CDCl<sub>3</sub>)** δ (ppm) 7.62-7.58 (m, 3H), 7.53 (d, J = 7.43 Hz, 1H), 7.45-7.46 (m, 1H), 7.39 (s, 2H), 7.27-7.19 (m, 4H), 7.13 (s, 1H), 7.07-7.06 (m, 1H), 2.62-2.63 (m, 1H), 2.59-2.57 (m, 1H), 2.45 (s, 3H). **<sup>13</sup>C NMR (125 MHz, CDCl<sub>3</sub> + DMSO-*D*<sub>6</sub>)** δ (ppm) 197.10, 172.92, 170.47, 164.89, 154.64, 140.34, 138.87, 136.52, 133.03, 128.78, 128.19, 128.03, 127.57, 126.18, 125.78, 122.82, 121.19, 120.41, 113.34, 43.98, 26.21. **HRMS (ESI)** calcd. for C<sub>23</sub>H<sub>19</sub>ClN<sub>4</sub>OS+H<sup>+</sup>: 429.1379, found: 429.1358.

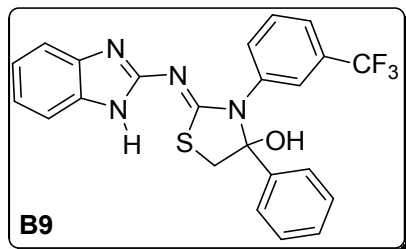

2-(1H-benzo[d]imidazol-2-ylimino)-4-phenyl-3-(3-(trifluoromethyl)phenyl)thiazolidin-4-ol  
White solid, yield: 30%, **Mp**: 108-110 °C.

**Rf**: 0.40 (EtOAc/Hexane: 70/30, UV light and *p*-anisaldehyde solution).

**<sup>1</sup>H NMR (300 MHz, CDCl<sub>3</sub>)** δ (ppm) 7.70-7.64 (m, 4H), 7.42-7.41 (m, 5H), 7.31 (d, *J* = 7.78 Hz, 2H), 7.17-7.15 (m, 2H), 3.92 (br s, 1H). **<sup>13</sup>C NMR (125 MHz, CDCl<sub>3</sub> + DMSO-*D*<sub>6</sub>)** δ (ppm) 159.13, 149.52, 140.42, 130.38, 128.69, 127.16, 126.43, 126.12, 123.26, 122.10, 113.55, 40.69.

**HRMS (ESI)** calcd. for C<sub>23</sub>H<sub>17</sub>F<sub>3</sub>N<sub>4</sub>OS+H<sup>+</sup>: 455.1147, found: 455.1141.

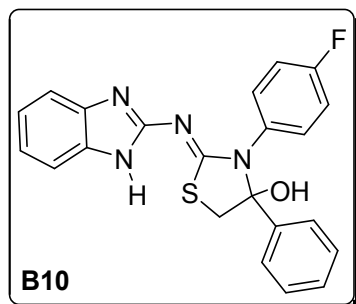

2-(1H-benzo[d]imidazol-2-ylimino)-3-(4-fluorophenyl)-4-phenylthiazolidin-4-ol  
White solid, yield: 34%, **Mp**: 98-100 °C.

**Rf**: 0.47 (EtOAc/Hexane: 70/30, UV light and *p*-anisaldehyde solution).

**<sup>1</sup>H NMR (300 MHz, CDCl<sub>3</sub>)** δ (ppm) 8.14-7.92 (m, 1H), 7.70-7.63 (m, 1H), 7.52 (s, 2H), 7.40 (s, 2H), 7.33-7.11 (m, 6H), 6.86 (s, 1H), 4.20 (d, *J* = 11.70 Hz, 1H), 3.96 (d, *J* = 10.92 Hz, 1H).

**<sup>13</sup>C NMR (125 MHz, CDCl<sub>3</sub> + DMSO-*D*<sub>6</sub>)** δ (ppm) 169.57, 159.80, 150.86, 148.62, 138.78, 132.40, 129.93, 129.09, 128.37, 127.96, 127.44, 126.06, 123.52, 122.84, 114.58, 111.80, 111.02, 110.68, 43.44. **HRMS (ESI)** calcd. for C<sub>22</sub>H<sub>17</sub>FN<sub>4</sub>OS+H<sup>+</sup>: 405.1179, found: 405.1166.

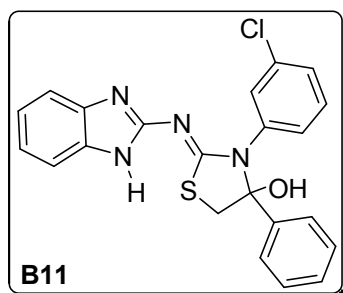

2-(1H-benzo[d]imidazol-2-ylimino)-3-(3-chlorophenyl)-4-phenylthiazolidin-4-ol

White solid, yield: 78%, **Mp**: 128-130 °C.

**Rf**: 0.46 (EtOAc/Hexane: 30/70, UV light and *p*-anisaldehyde solution).

**<sup>1</sup>H NMR (300 MHz, CDCl<sub>3</sub>)** δ (ppm) 7.63 (s, 1H), 7.55 (d, *J* = 7.50 Hz, 2H), 7.41-7.55 (m, 3H), 7.27 (t, *J* = 7.76 Hz, 2H), 7.23-7.20 (m, 2H), 7.13 (t, *J* = 7.89 Hz, 1H), 7.09-7.07 (m, 2H), 3.82 (d, *J* = 12.04 Hz, 1H), 3.62 (d, *J* = 11.91 Hz, 1H). **<sup>13</sup>C NMR (125 MHz, CDCl<sub>3</sub> + DMSO-*D*<sub>6</sub>)** δ (ppm) 164.38, 154.22, 139.98, 139.45, 136.25, 132.23, 128.35, 127.94, 127.31, 127.18, 126.56, 125.80, 125.67, 120.24, 112.75, 43.61. **HRMS (ESI)** calcd. for C<sub>22</sub>H<sub>17</sub>ClN<sub>4</sub>OS+H<sup>+</sup>: 421.0884, found: 421.0869.

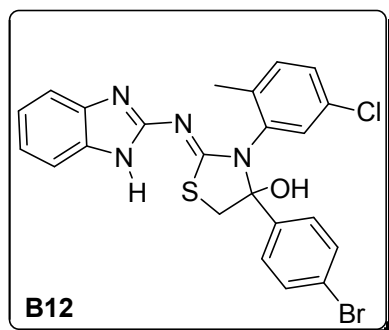

2-(1H-benzo[d]imidazol-2-ylimino)-4-(4-bromophenyl)-3-(5-chloro-2-methylphenyl)thiazolidin-4-ol

White solid, yield: 73%, **Mp**: 161-163 °C.

**Rf**: 0.49 (EtOAc/Hexane: 70/30, UV light and *p*-anisaldehyde solution).

**<sup>1</sup>H NMR (700 MHz, CDCl<sub>3</sub>)** δ (ppm) 7.67 (d, *J* = 9.83 Hz, 2H), 7.59-7.51 (m, 4H), 7.38 (d, *J* = 6.60 Hz, 1H), 7.29-7.17 (m, 4H), 4.32 (d, *J* = 11.78 Hz, 1H), 3.94 (d, *J* = 11.91 Hz, 1H), 2.08 (s, 3H). **<sup>13</sup>C NMR (176 MHz, CDCl<sub>3</sub> + DMSO-*D*<sub>6</sub>)** δ (ppm) 167.64, 166.36, 150.88, 148.22, 137.53, 131.50, 130.60, 129.83, 128.79, 127.89, 127.20, 123.64, 123.20, 122.65, 112.23, 111.80, 43.11, 17.68. **HRMS (ESI)** calcd. for C<sub>23</sub>H<sub>18</sub>BrClN<sub>4</sub>OS+H<sup>+</sup>: 513.0146, found: 513.0127.

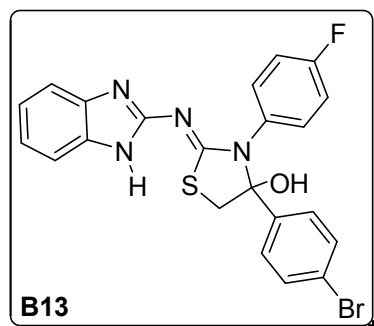

2-(1H-benzo[d]imidazol-2-ylimino)-4-(4-bromophenyl)-3-(4-fluorophenyl)thiazolidin-4-ol

White solid, yield: 72%, **Mp**: 109-111 °C.

**Rf**: 0.51 (EtOAc/Hexane: 70/30, UV light and *p*-anisaldehyde solution).

**<sup>1</sup>H NMR (300 MHz, CDCl<sub>3</sub>)** δ (ppm) 7.44-7.40 (m, 4H), 7.37-7.34 (m, 2H), 7.26-7.11 (m, 4H), 6.63-6.60 (m, 2H), 3.96 (d, *J* = 12.04 Hz, 1H), 3.84 (d, *J* = 12.04 Hz, 1H). **<sup>13</sup>C NMR (125 MHz, CDCl<sub>3</sub>)** δ (ppm) 171.55, 162.75, 160.73, 151.20, 137.90, 132.27, 131.51, 130.41, 130.04,

129.50, 128.50, 124.59, 123.30, 115.68, 115.50, 112.63, 43.89. **HRMS (ESI)** calcd. for  $C_{22}H_{16}N_4OSBrF+H^+$ : 483.0285, found: 483.0268.

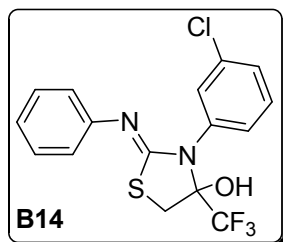

3-(3-chlorophenyl)-2-(phenylimino)-4-(trifluoromethyl)thiazolidin-4-ol: Prepared by the above same procedure from 1-(3-chlorophenyl)-3-phenylthiourea and 3-bromo-1,1,1-trifluoropropan-2-one. White solid, yield: 83%, **Mp**: 120-122 °C.

**Rf**: 0.53 (EtOAc/Hexane: 30/70, UV light and *p*-anisaldehyde solution).

**<sup>1</sup>H NMR (300 MHz, CDCl<sub>3</sub>)** δ (ppm) 7.50-7.28 (m, 6H), 7.14 (d, *J* = 7.42 Hz, 1H), 7.98-7.87 (m, 2H), 3.74 (d, *J* = 12.27 Hz, 1H), 3.50 (d, *J* = 12.27 Hz, 1H). **<sup>13</sup>C NMR (125 MHz, CDCl<sub>3</sub>)** δ (ppm) 159.03, 147.53, 137.24, 130.13, 128.21, 127.74, 126.79, 126.37, 123.98, 122.33, 121.09, 34.48. **HRMS (ESI)** calcd. for  $C_{16}H_{12}N_2OSCIF_3+H^+$ : 373.0389, found: 373.0382.

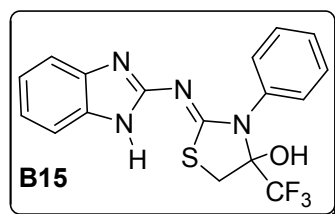

2-(1H-benzo[d]imidazol-2-ylimino)-3-phenyl-4-(trifluoromethyl)thiazolidin-4-ol

White solid, yield: 90%, **Mp**: 188-190 °C.

**Rf**: 0.25 (EtOAc/Hexane: 30/70, UV light and *p*-anisaldehyde solution).

**<sup>1</sup>H NMR (300 MHz, CDCl<sub>3</sub>)** δ (ppm) 7.43-7.35 (m, 7H), 7.08-7.02 (m, 2H), 3.78 (d, *J* = 12.46 Hz, 1H), 3.53 (d, *J* = 12.46 Hz, 1H). **<sup>13</sup>C NMR (125 MHz, CDCl<sub>3</sub>)** δ (ppm) 164.89, 154.57, 152.37, 147.91, 138.11, 137.47, 130.20, 128.20, 127.72, 122.66, 121.04, 120.45, 118.92, 113.32, 35.09. **HRMS (ESI)** calcd. for  $C_{17}H_{13}N_4OSF_3+H^+$ : 379.0834, found: 379.0836.

# Spectral Data

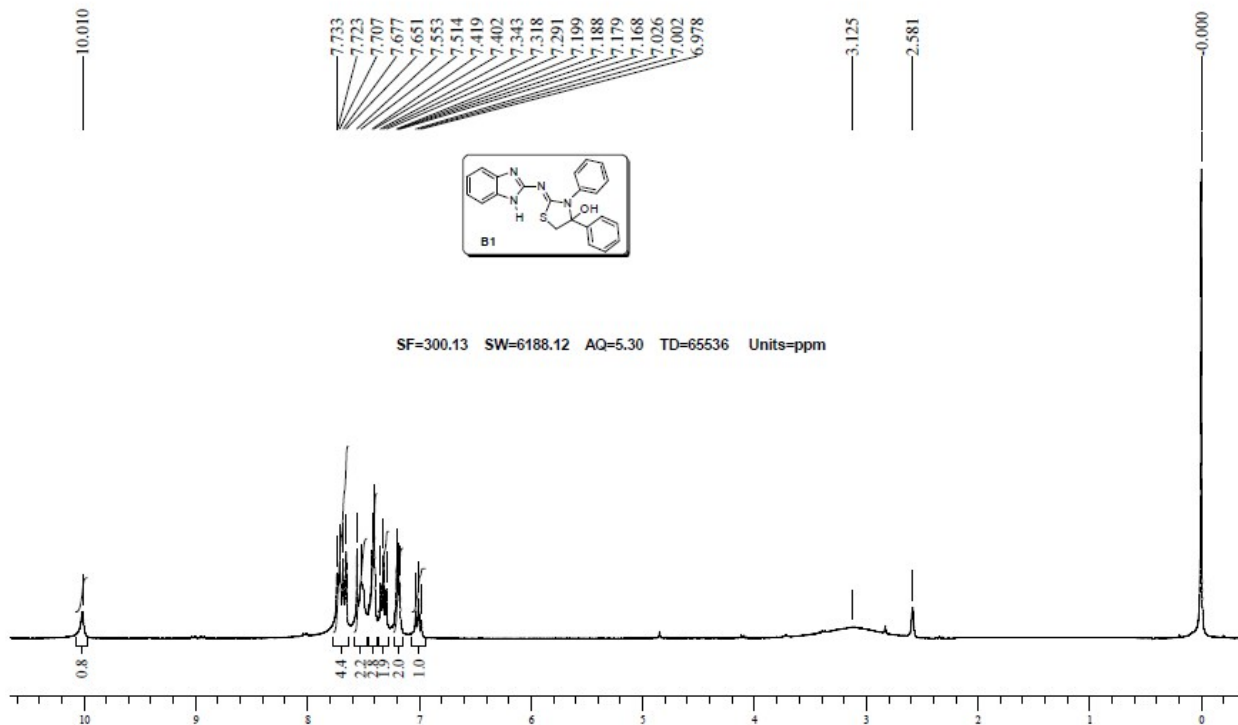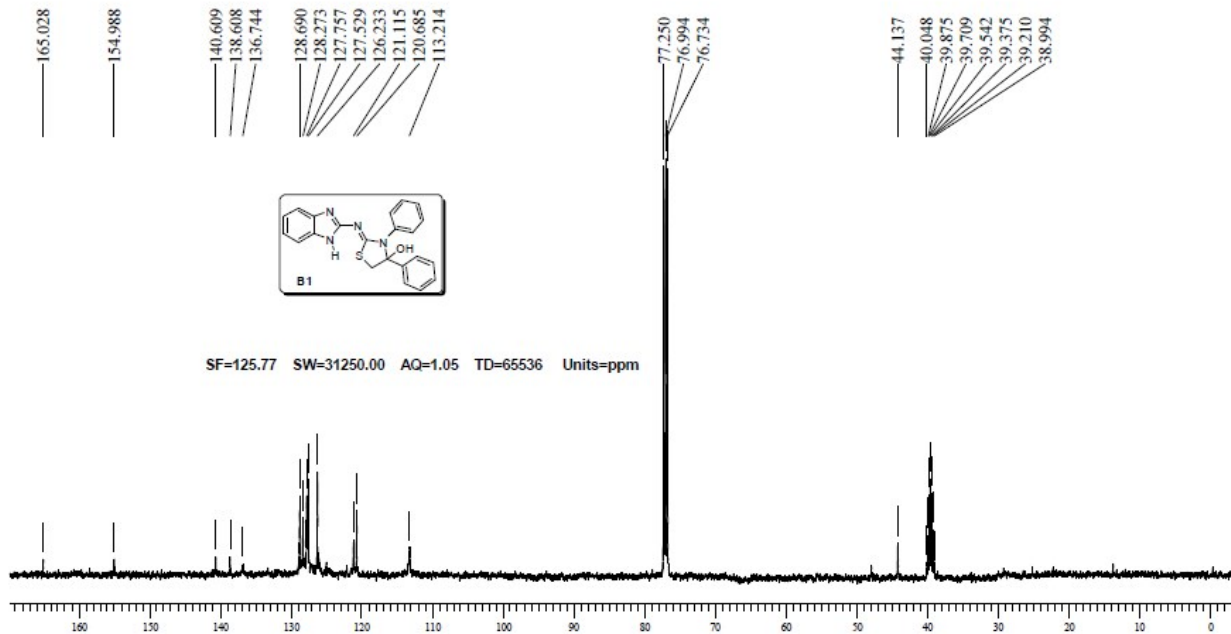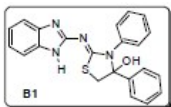



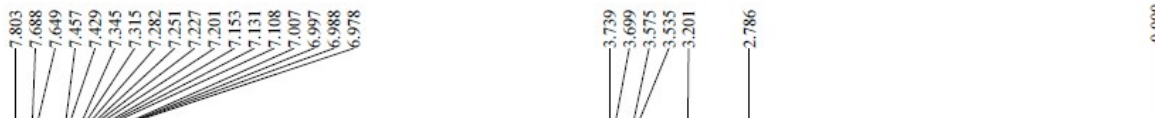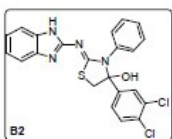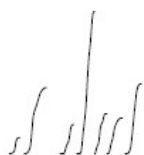

SF=300.13 SW=6188.12 AQ=5.30 TD=65536 Units=ppm

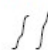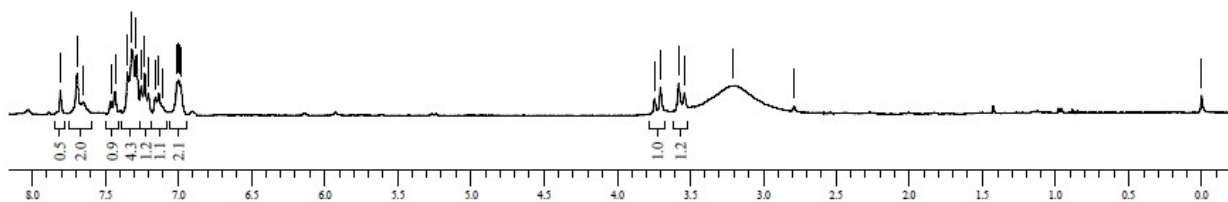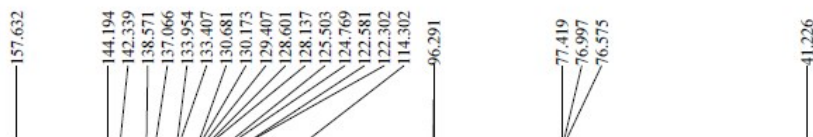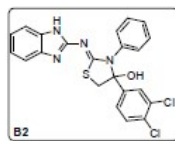

SF=75.48 SW=17985.61 AQ=1.82 TD=65536 Units=ppm

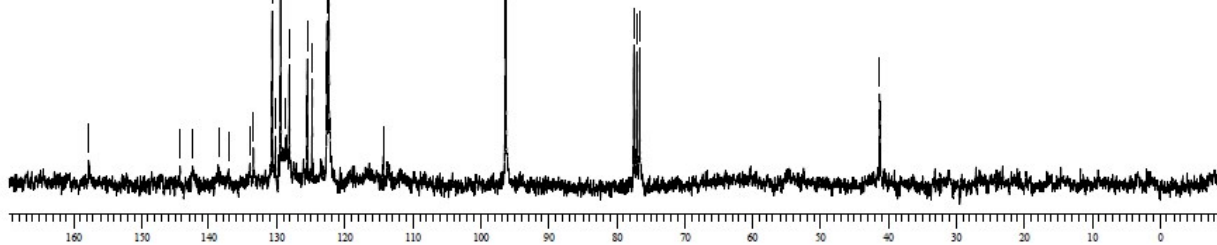

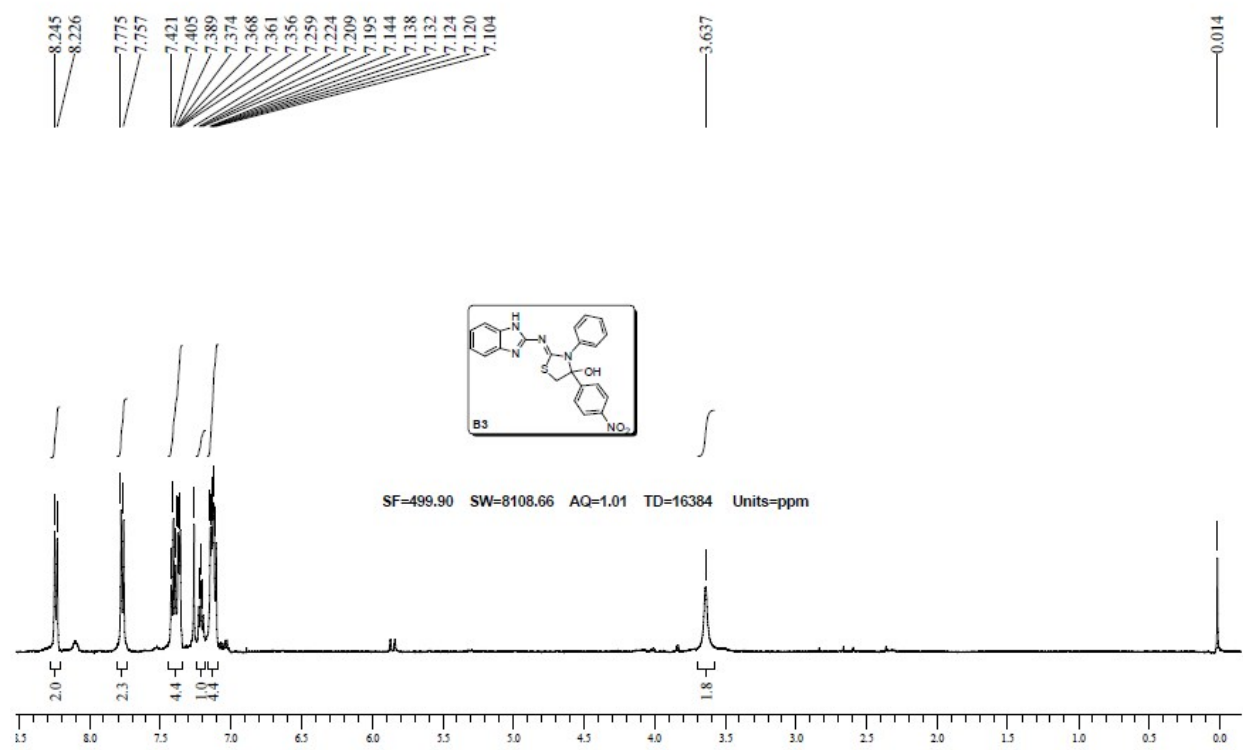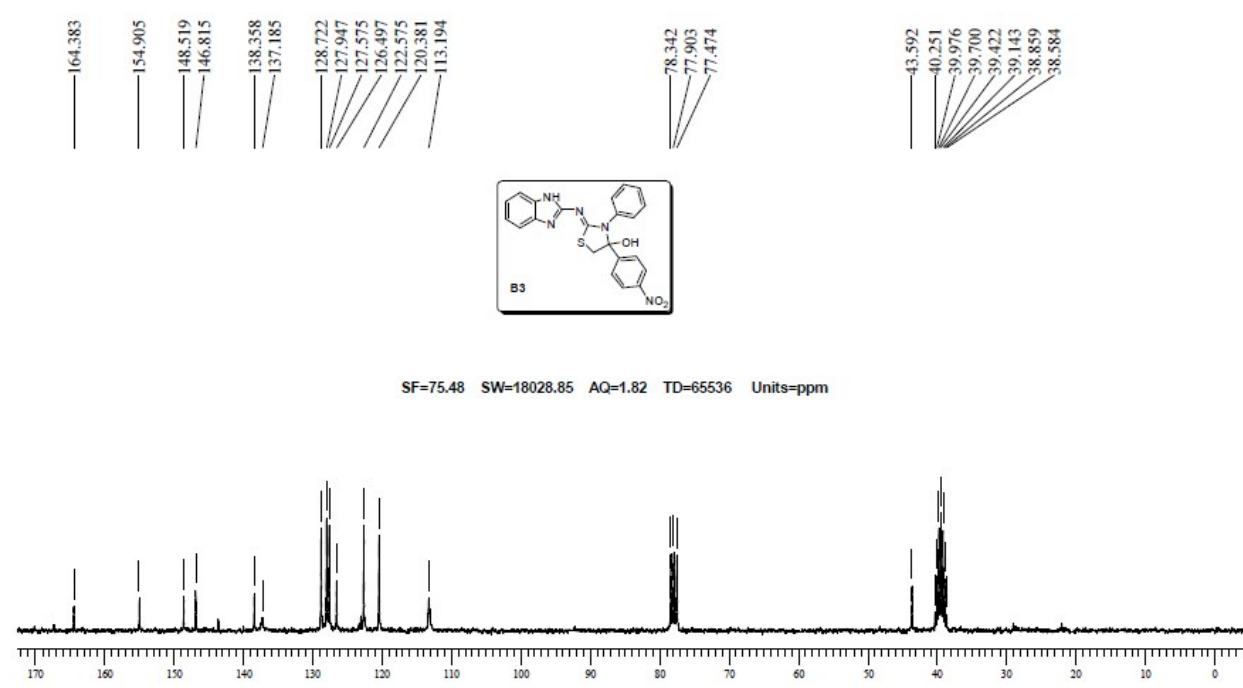

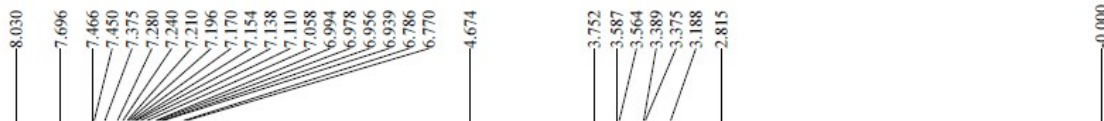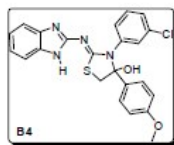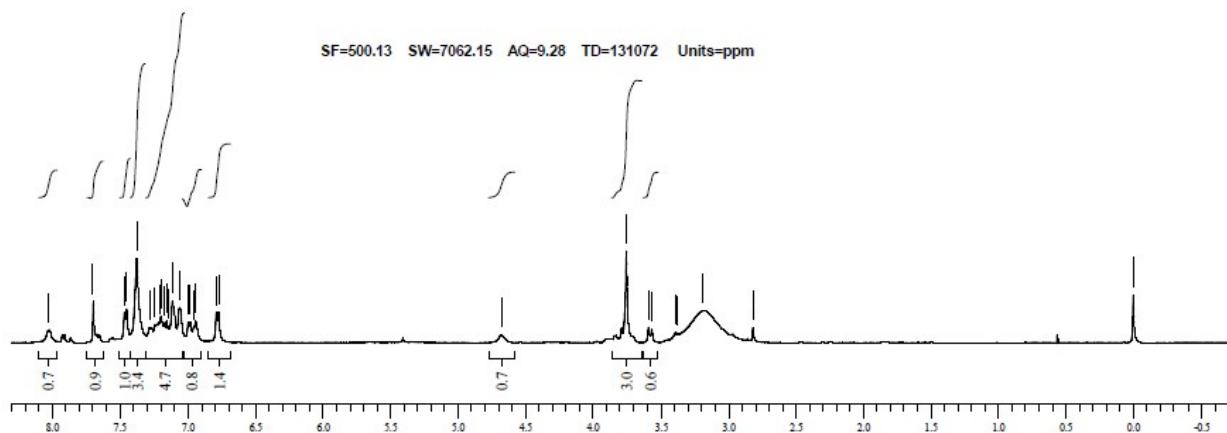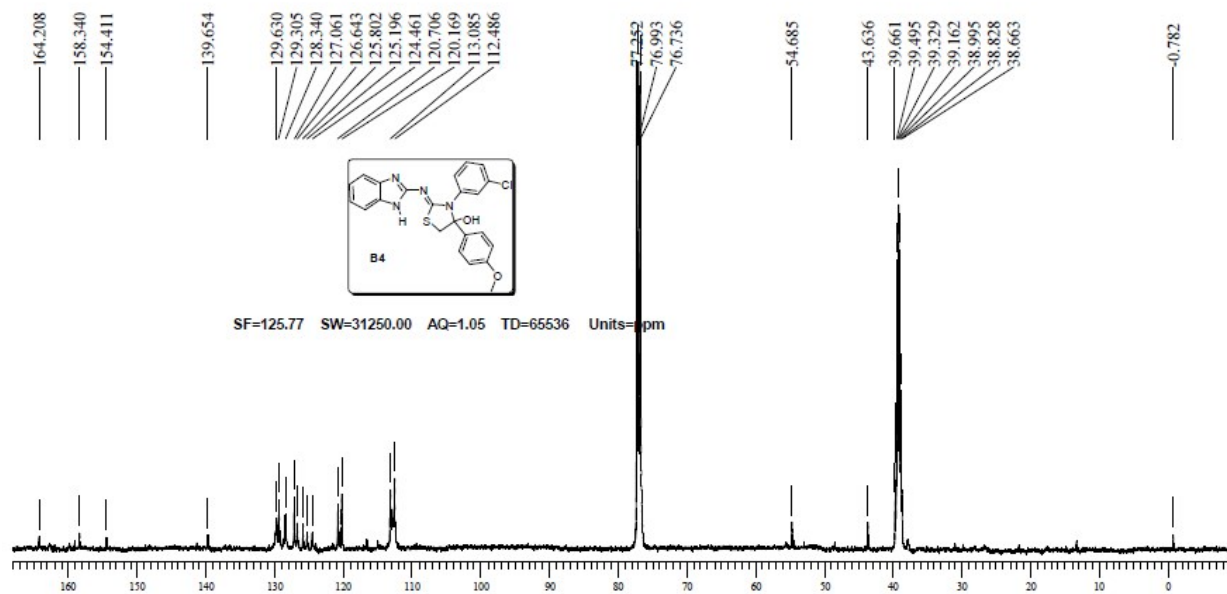

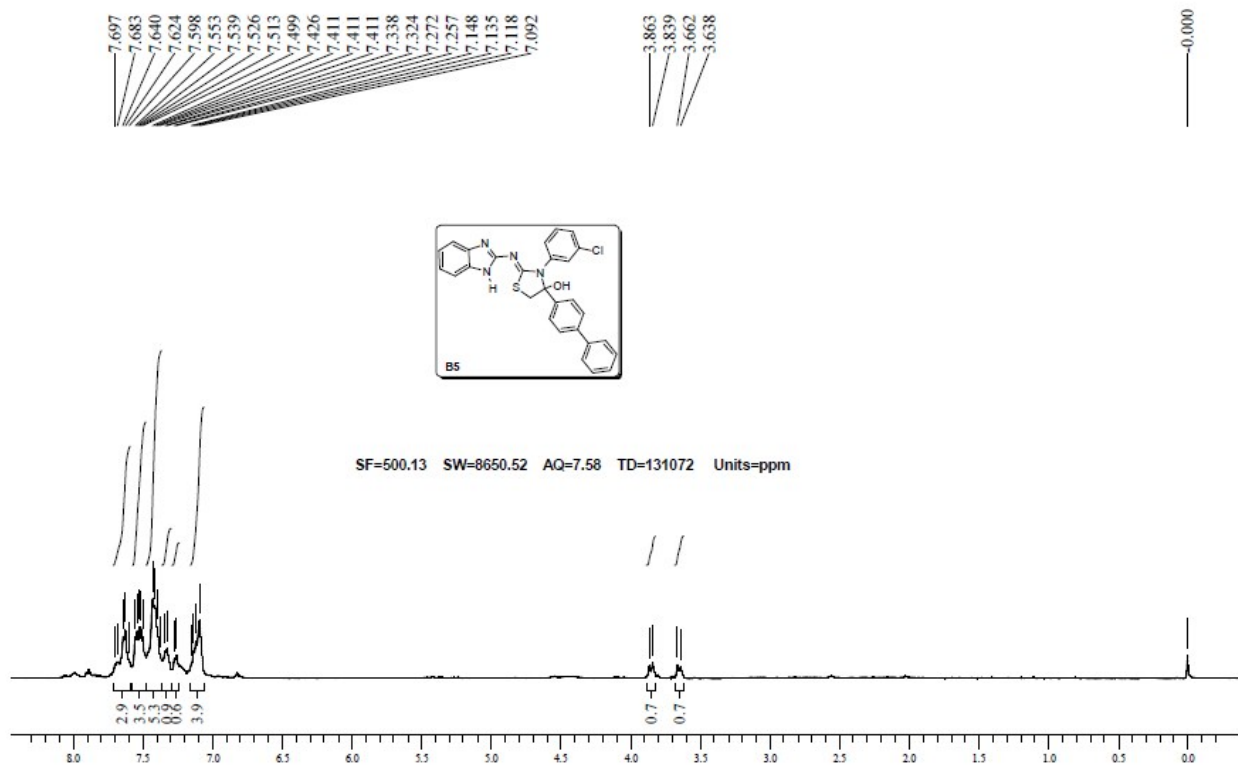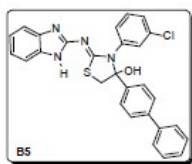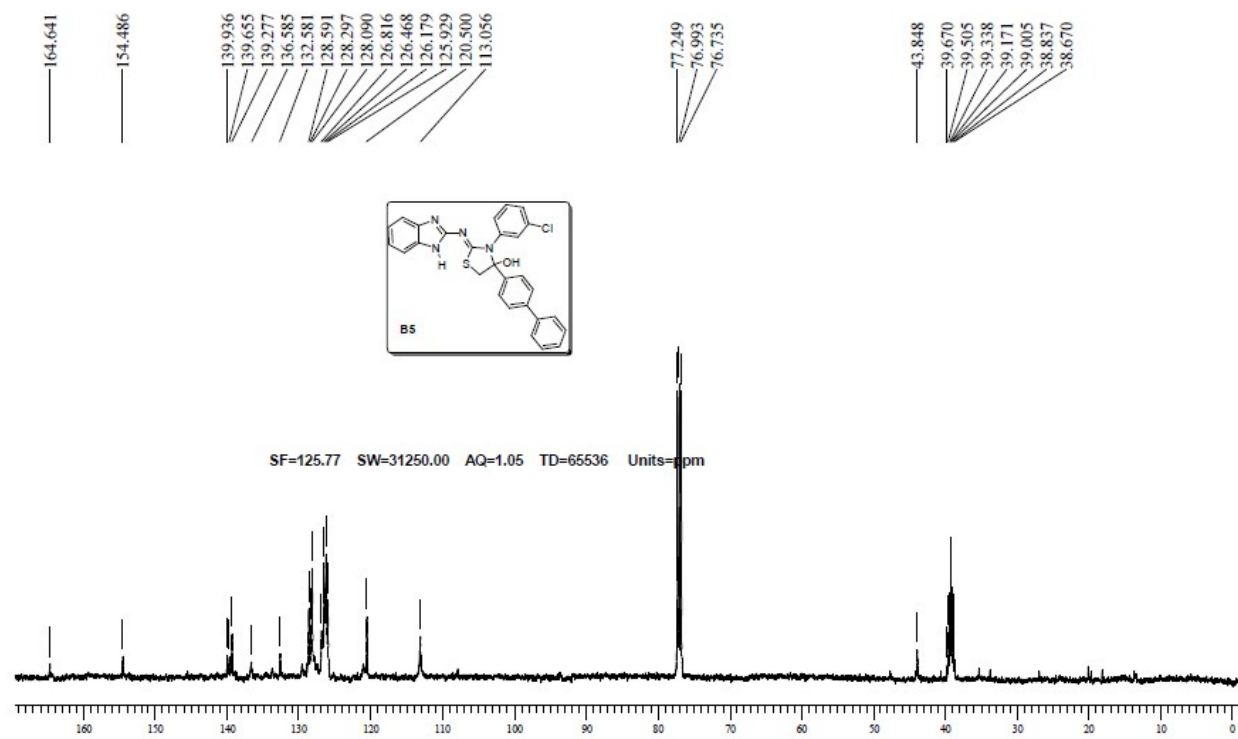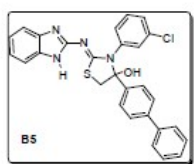

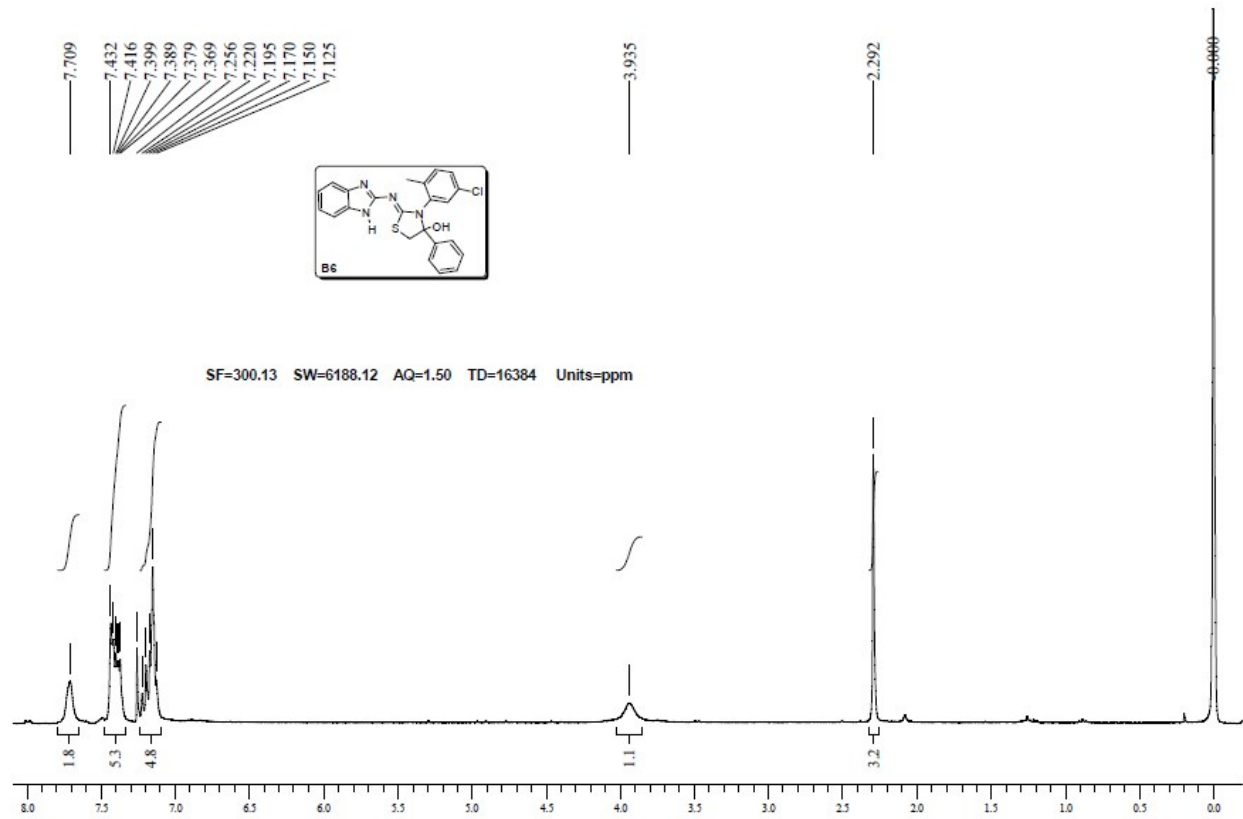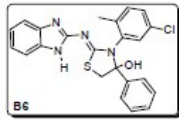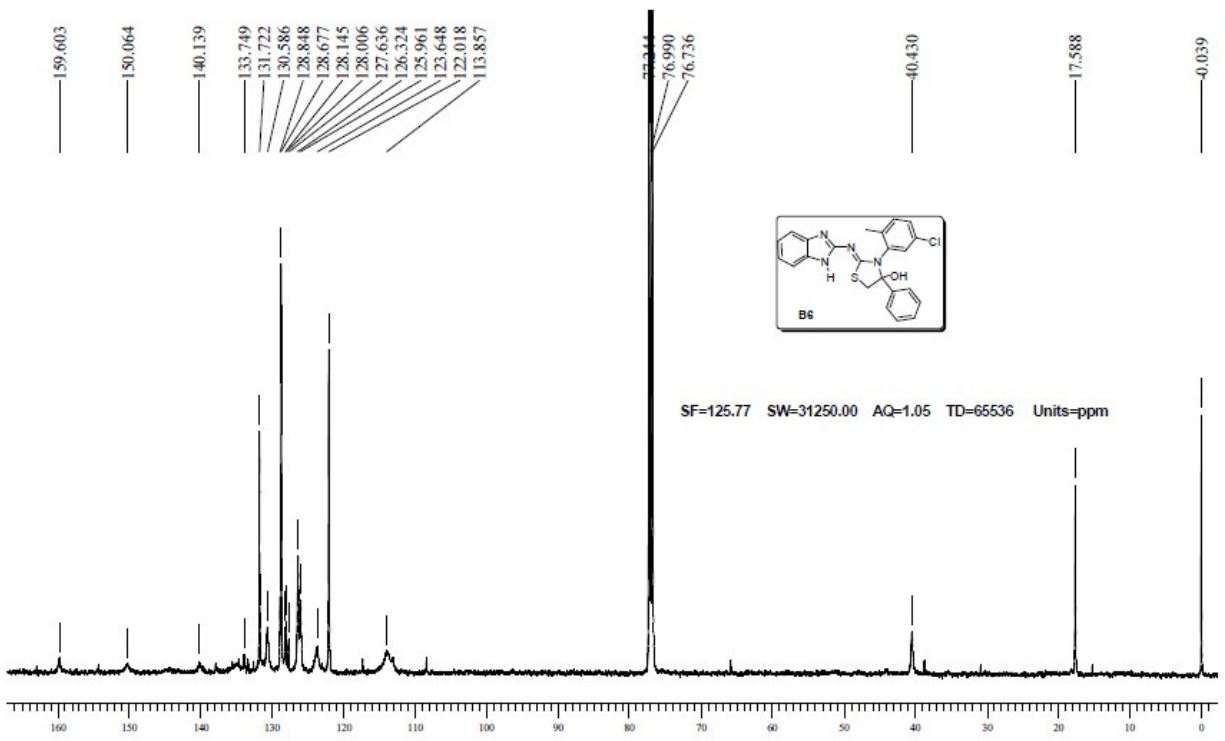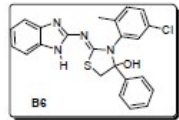

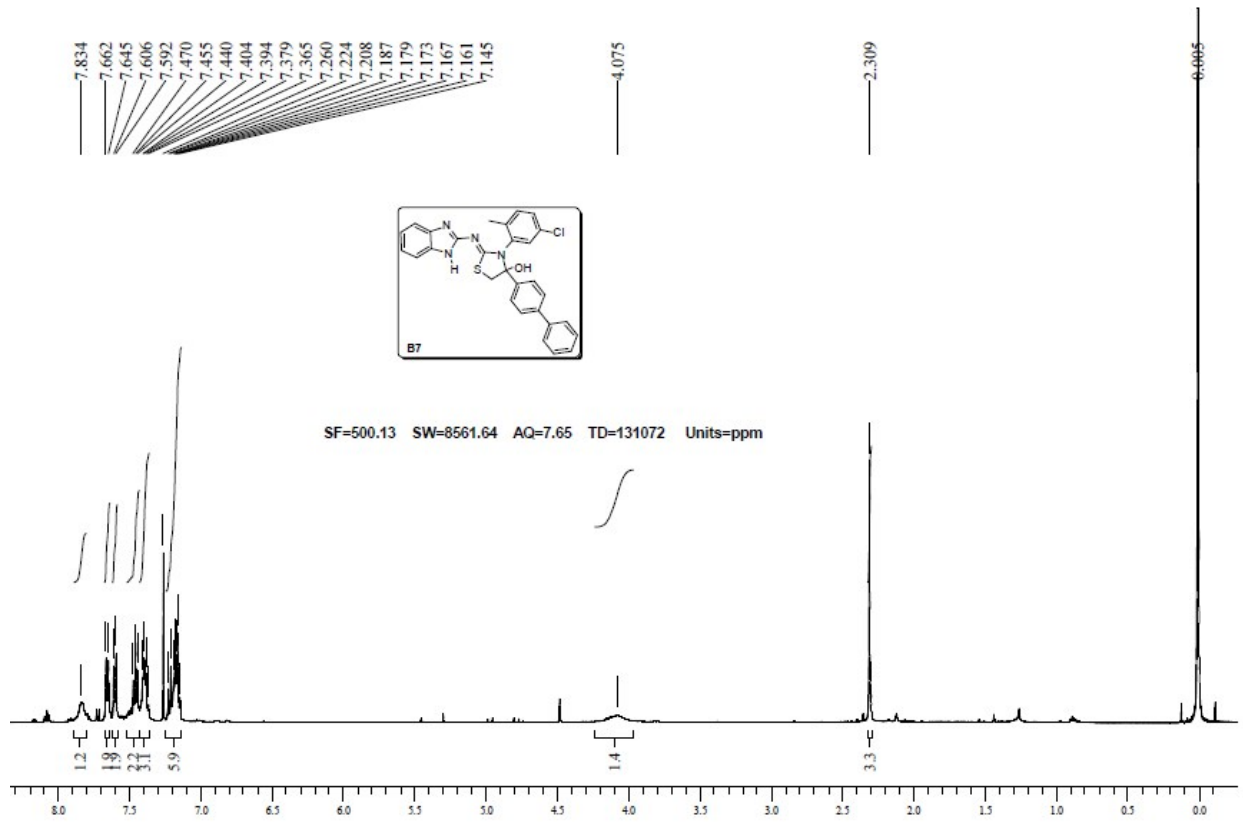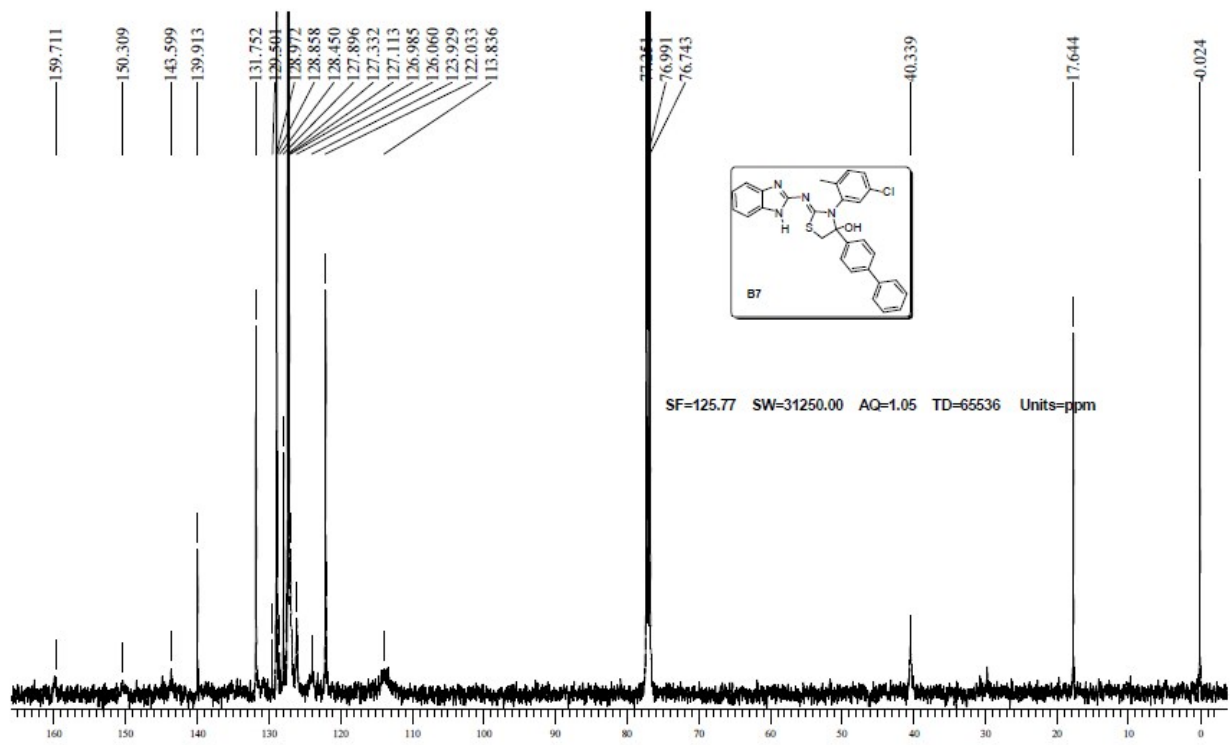

7.628  
7.614  
7.599  
7.584  
7.542  
7.527  
7.468  
7.459  
7.394  
7.270  
7.257  
7.242  
7.227  
7.213  
7.199  
7.137  
7.077  
7.066  
7.060

2.638  
2.622  
2.590  
2.578  
2.451

-0.000

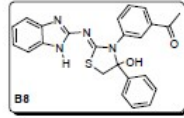

SF=500.13 SW=7062.15 AQ=9.28 TD=131072 Units=ppm

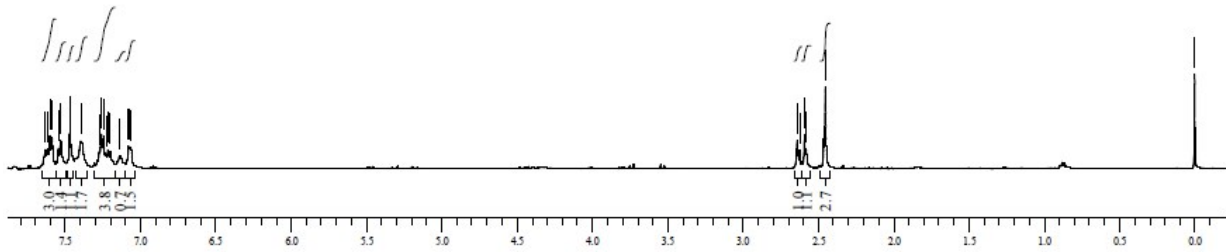

197.100  
172.920  
170.479  
164.891  
154.644  
140.345  
138.875  
136.524  
133.035  
128.781  
128.192  
128.031  
127.570  
126.182  
125.785  
122.822  
121.192  
120.417  
113.345  
77.260  
76.993  
76.736  
43.983  
39.915  
39.747  
39.580  
39.413  
39.246  
39.078  
38.911  
26.217

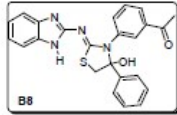

SF=125.77 SW=31250.00 AQ=1.05 TD=65536 Units=ppm

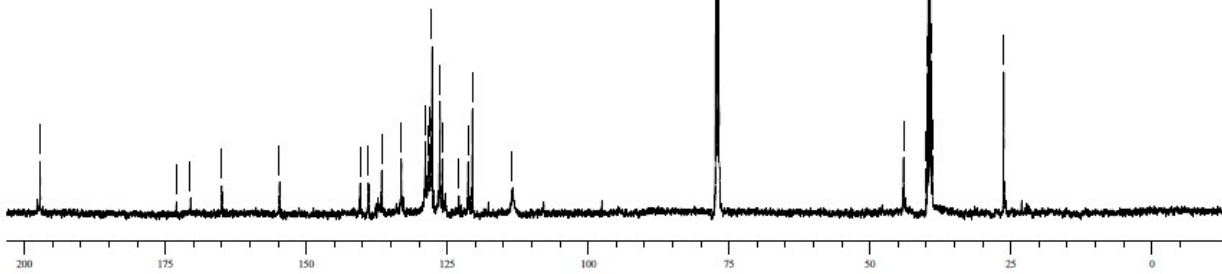

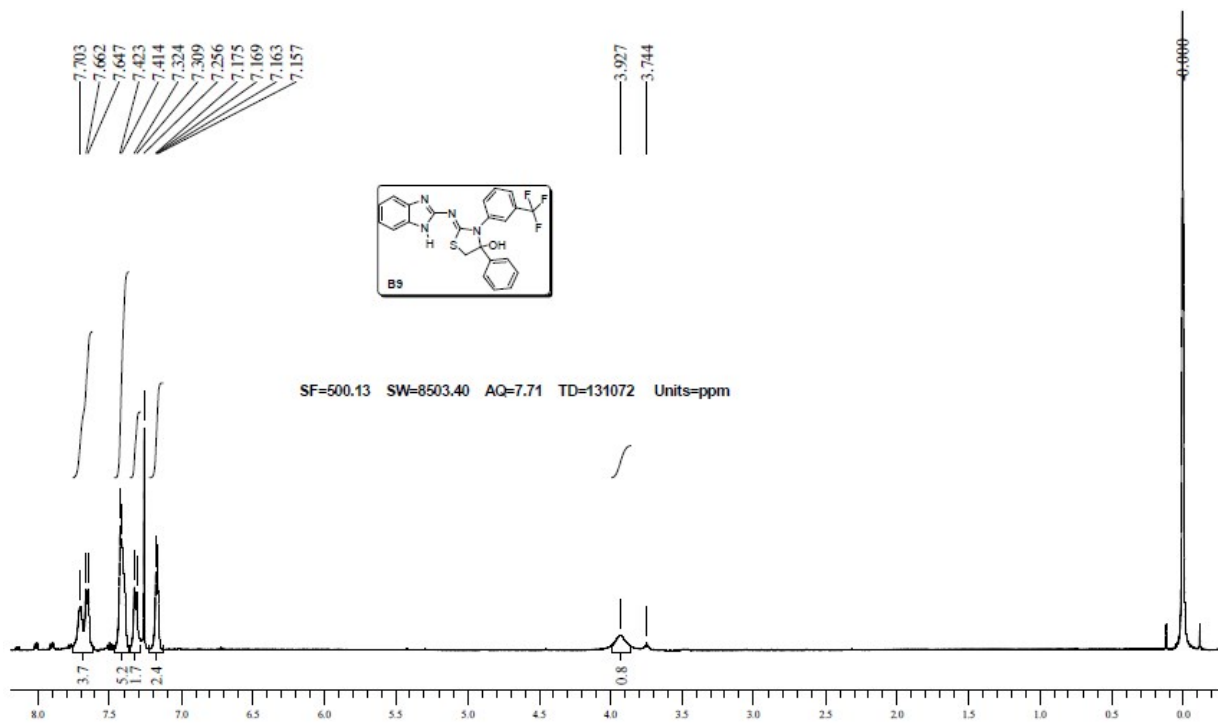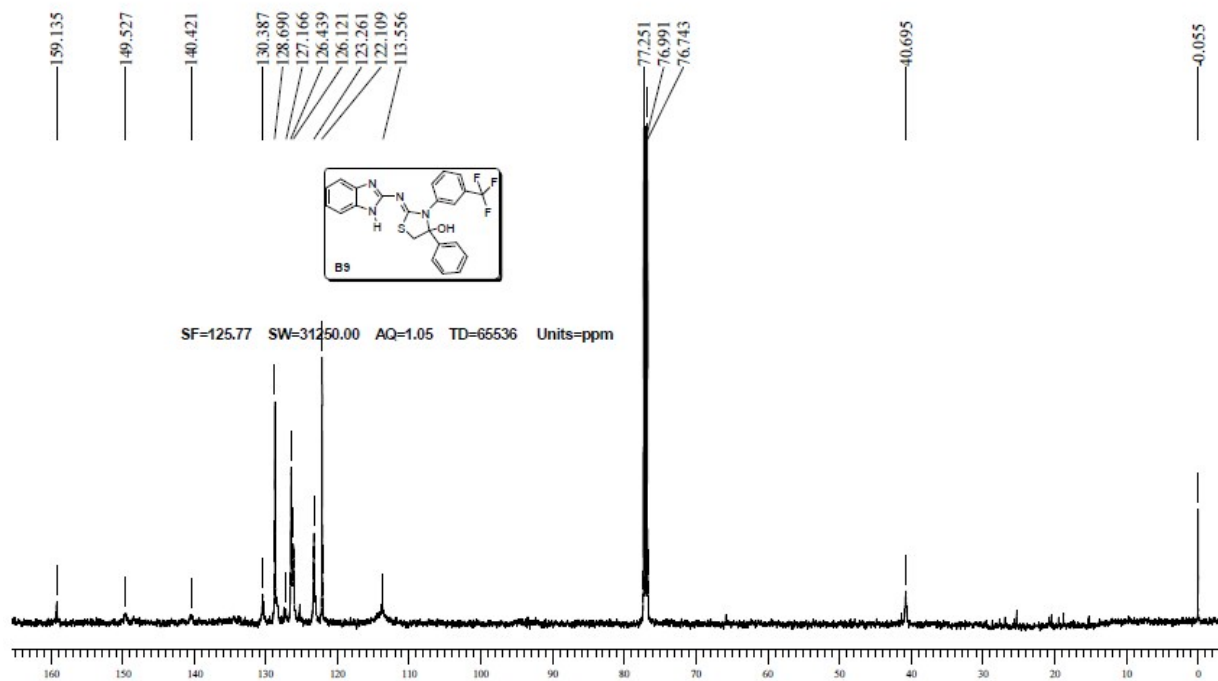



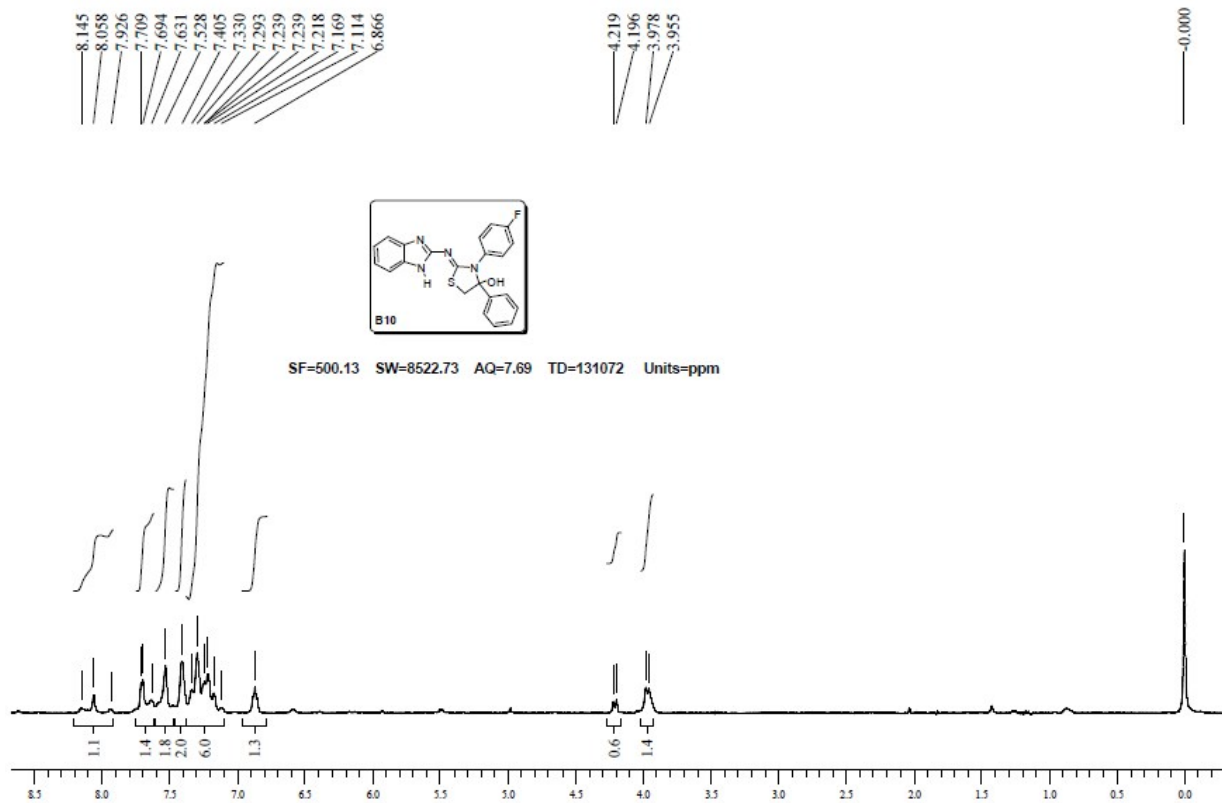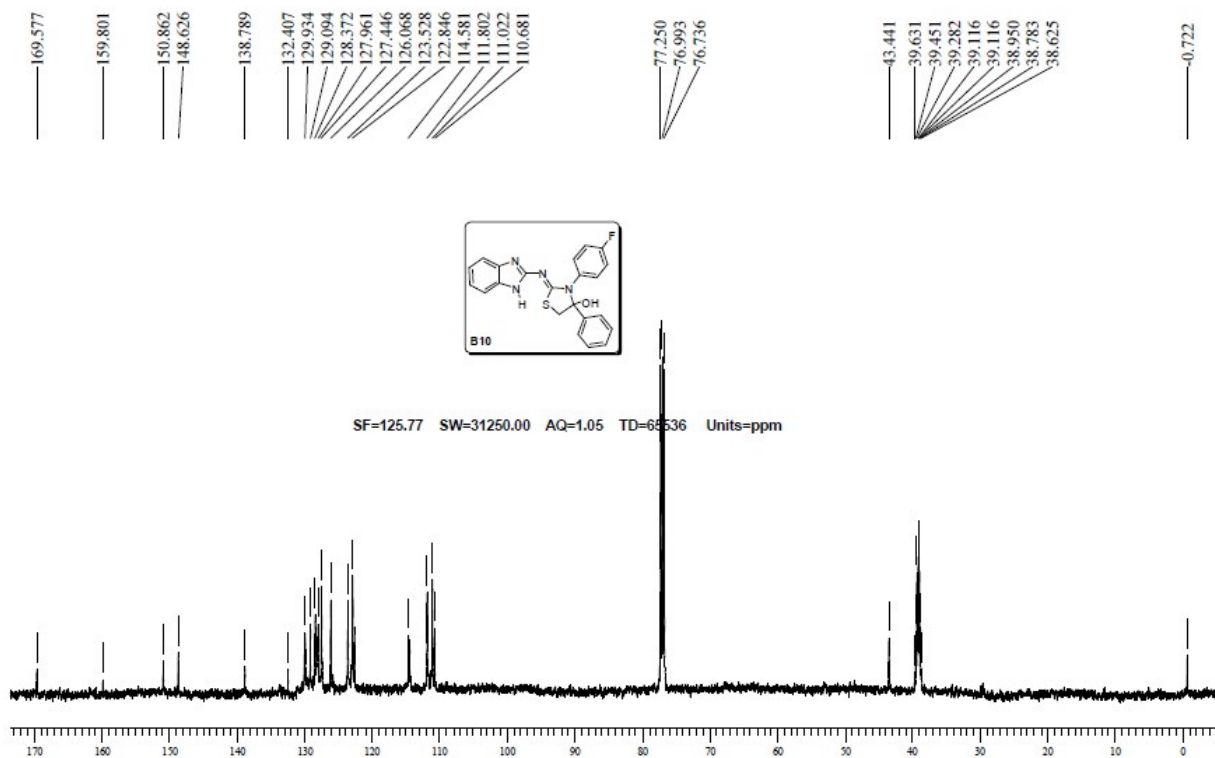

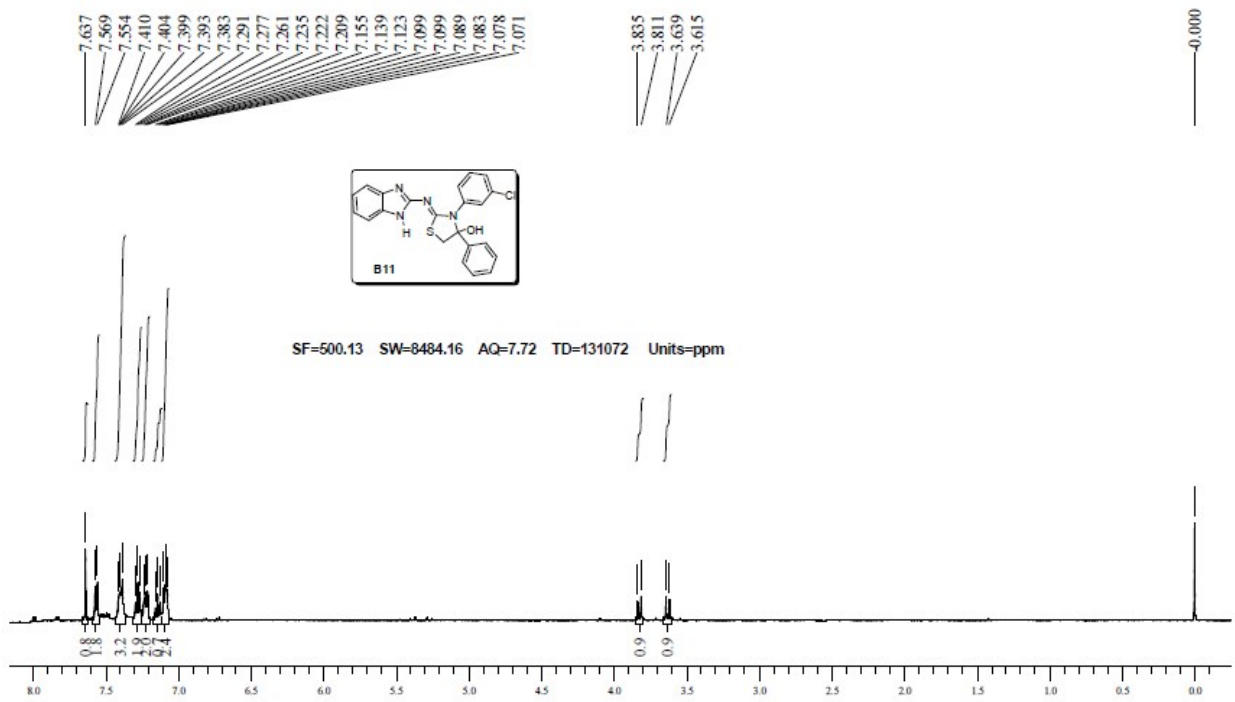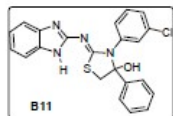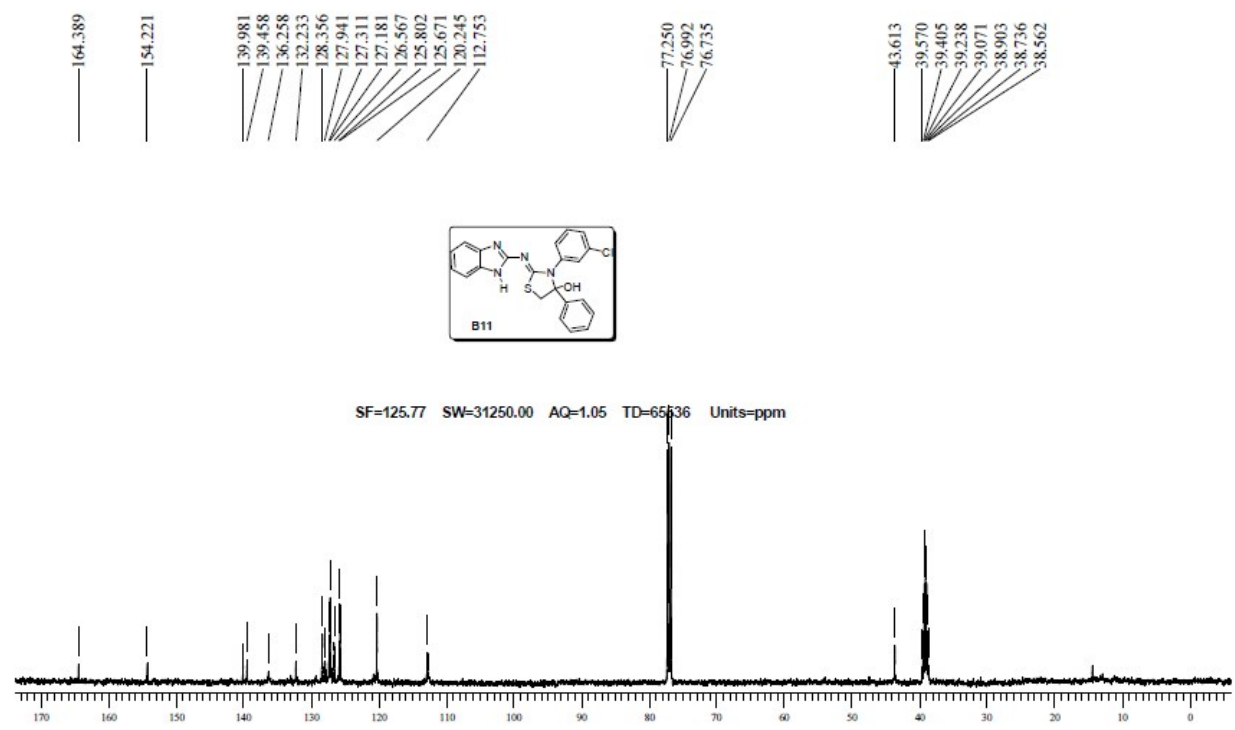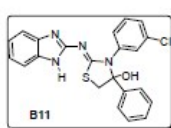

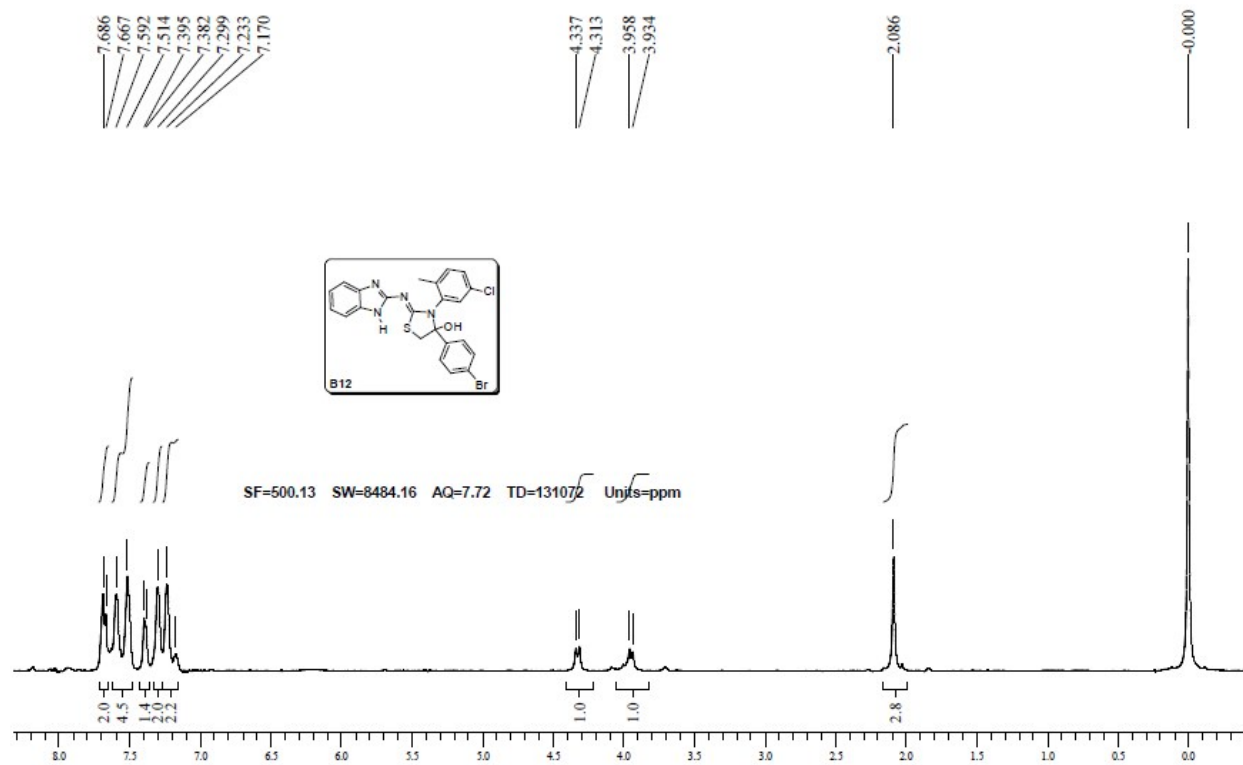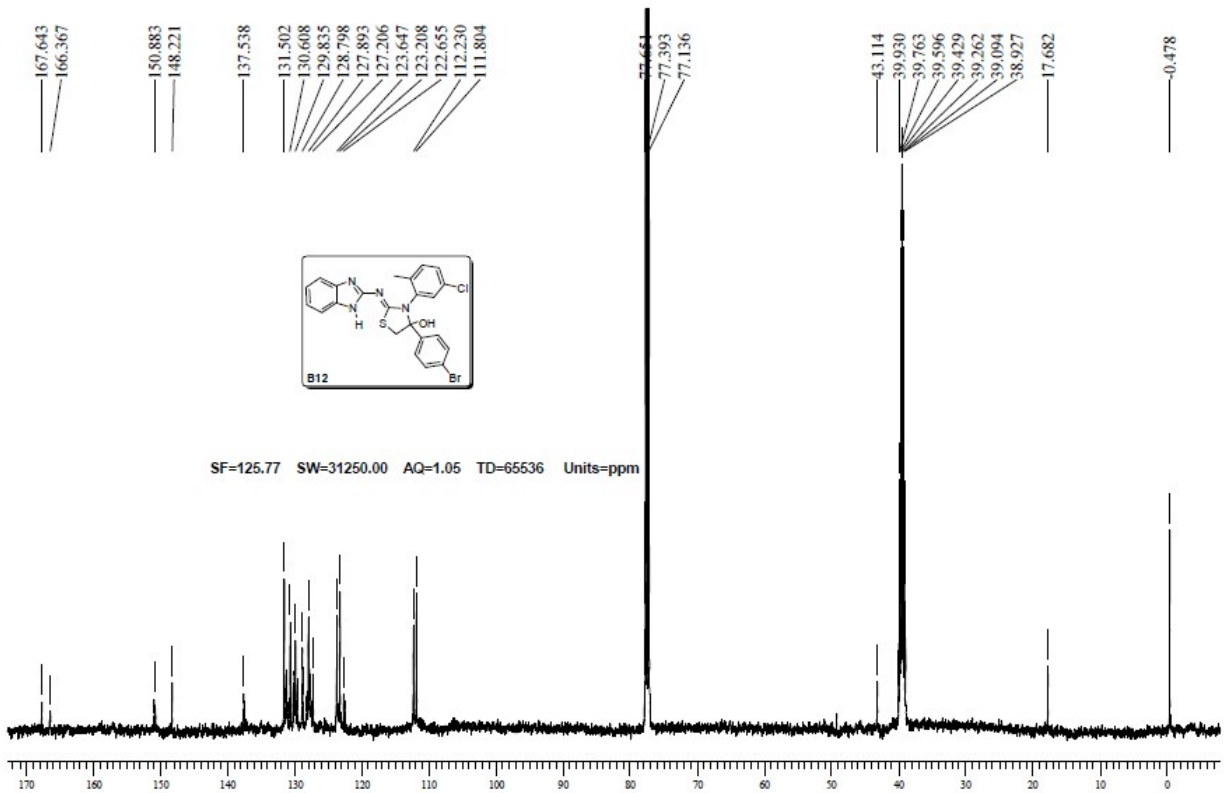

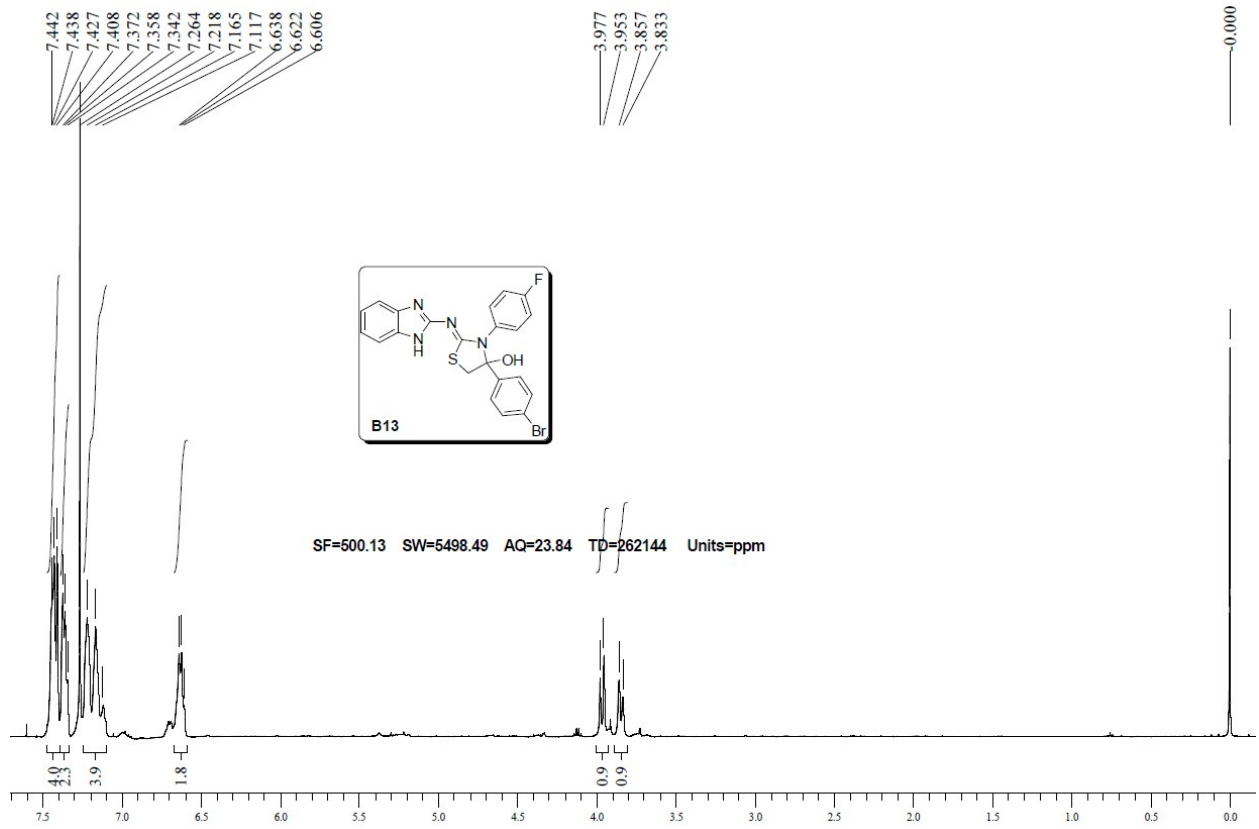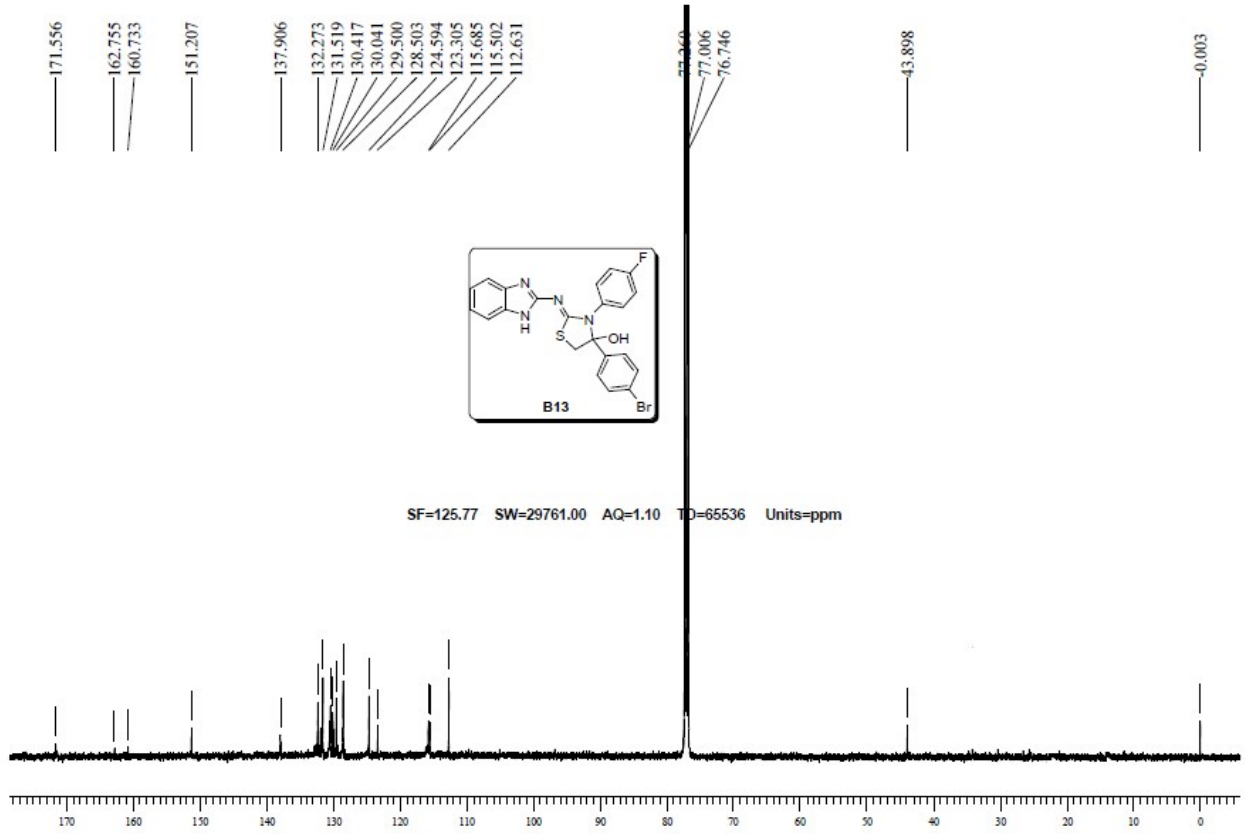

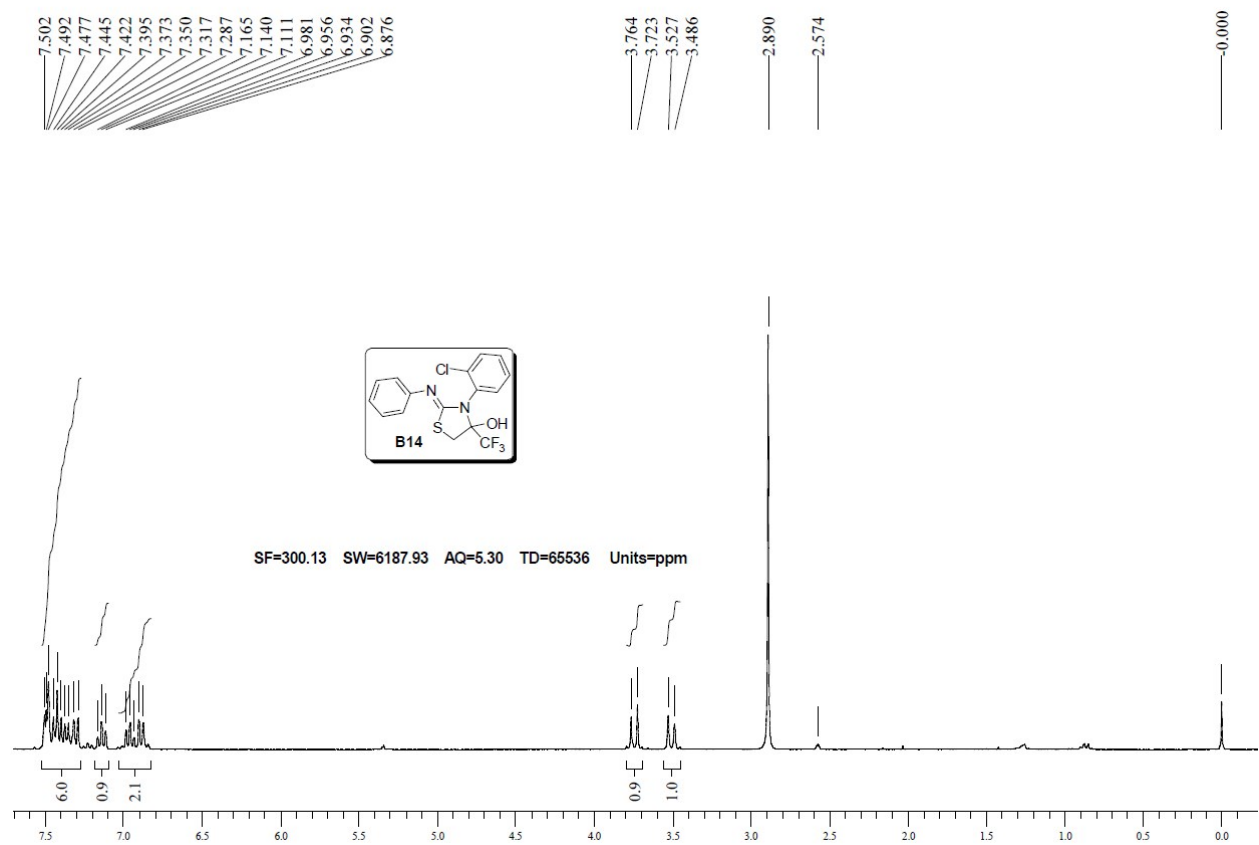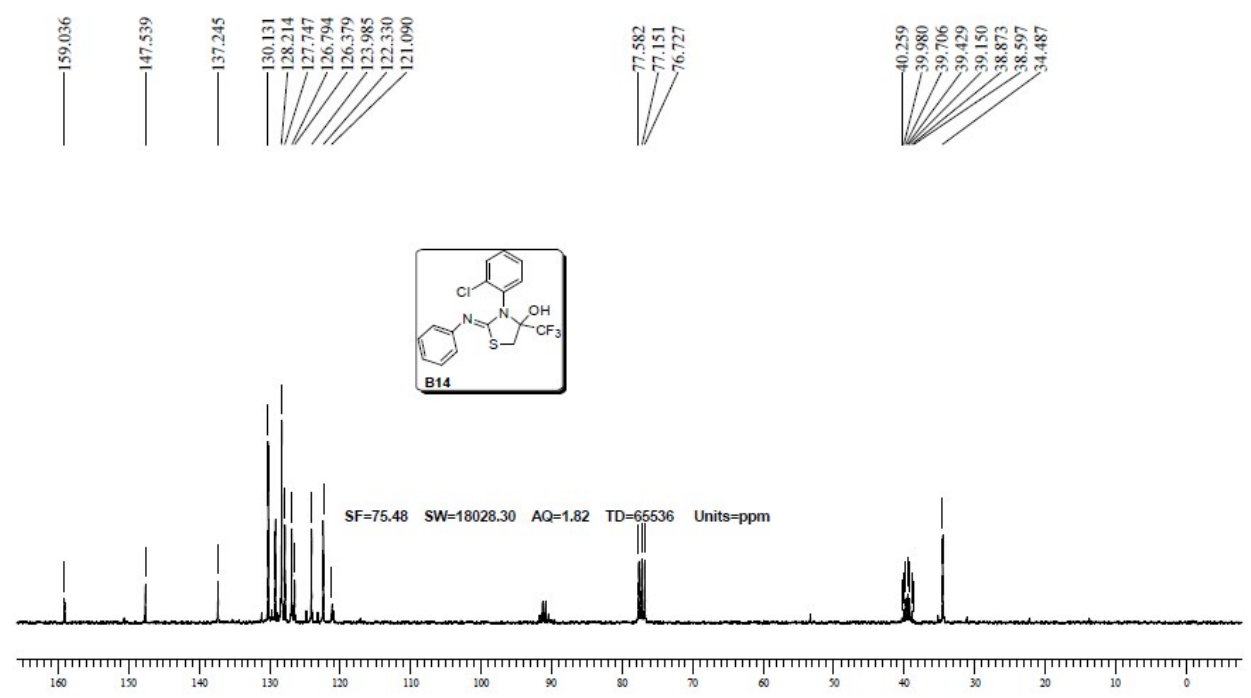

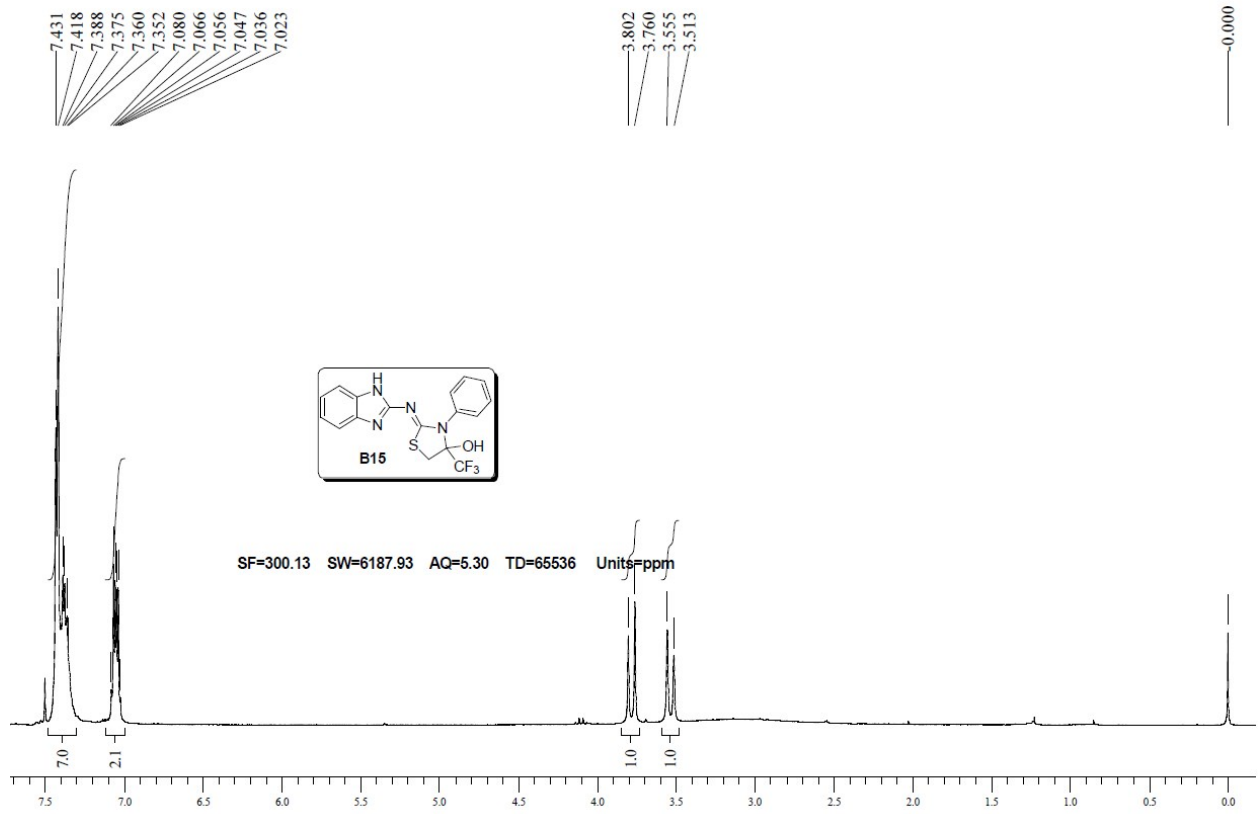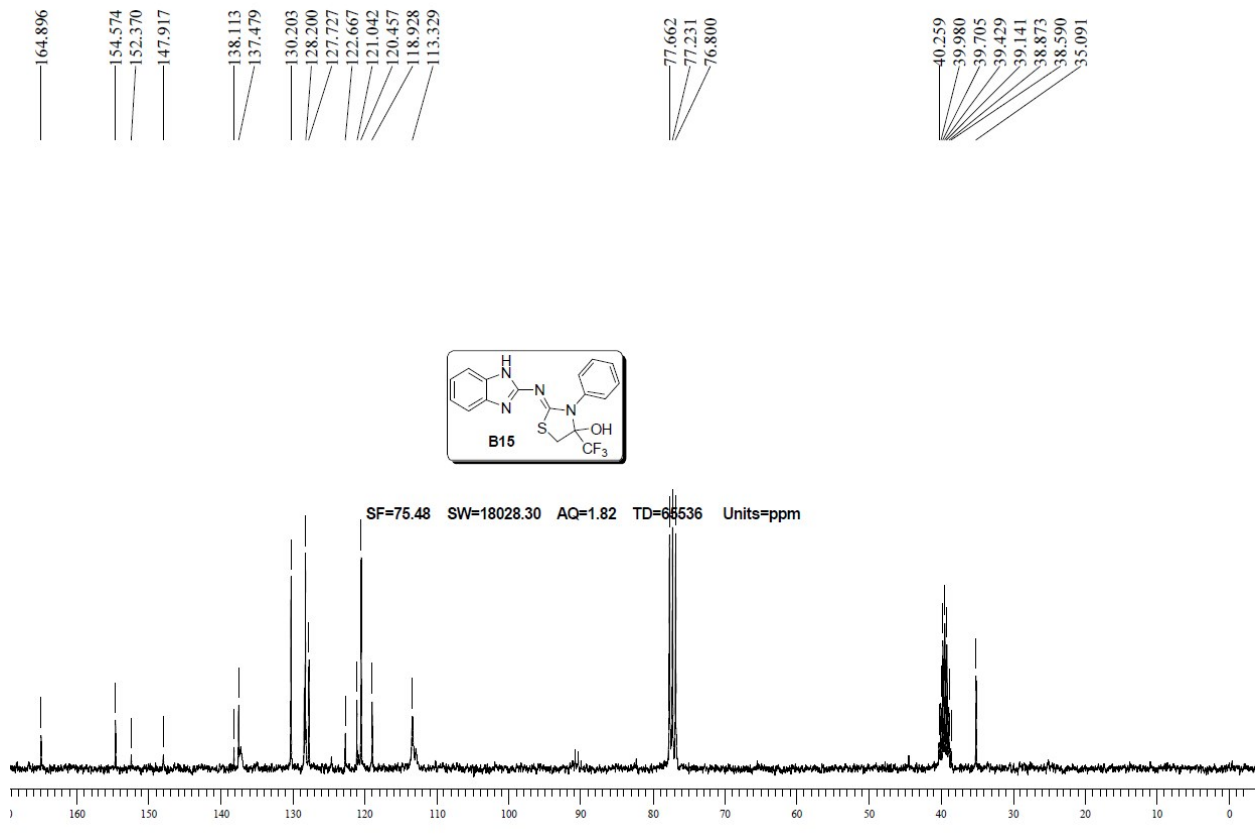

**Crystal data with structure refinement for 2-(1H-benzo[d]imidazol-2-ylimino)-4-(4-bromophenyl)-3-(5-chloro-2-methylphenyl)thiazolidin-4-ol (B12).**

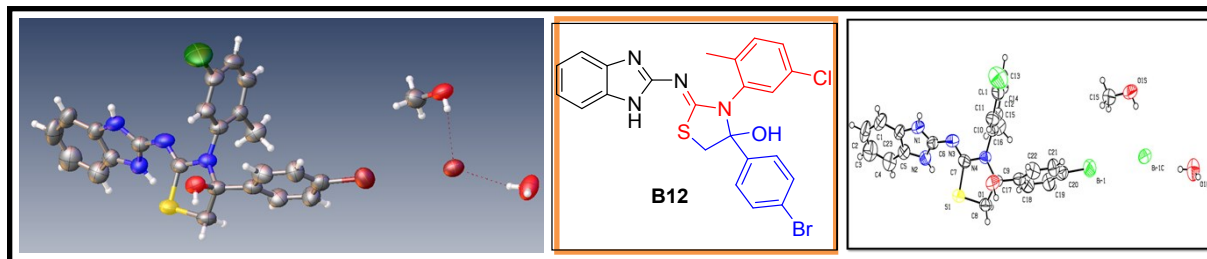

**X-ray analysis data of (B12).**

|                                              |                                                                                                                                                                                             |
|----------------------------------------------|---------------------------------------------------------------------------------------------------------------------------------------------------------------------------------------------|
| CCDC No.                                     | 1041069                                                                                                                                                                                     |
| Empirical formula                            | C <sub>23</sub> H <sub>18</sub> BrCl N <sub>4</sub> OS                                                                                                                                      |
| Temperature                                  | <i>T</i> = 293 K                                                                                                                                                                            |
| Formula weight                               | 512.30                                                                                                                                                                                      |
| Wavelength                                   | 1.54184 Å                                                                                                                                                                                   |
| Crystal system, space group                  | Triclinic, $P\bar{1}$ (No. 2)                                                                                                                                                               |
| Unit cell dimensions                         | <i>a</i> = 7.9404 (8) Å,<br><i>b</i> = 11.6089 (14) Å<br><i>c</i> = 15.7240 (18) Å,<br>$\alpha$ = 71.877 (10)<br>$\beta$ = 79.537 (9)<br>$\gamma$ = 78.741 (10), $2\theta_{\max}$ = 70.857° |
| Volume                                       | <i>V</i> = 1339.6 (3) Å <sup>3</sup>                                                                                                                                                        |
| <i>Z</i> , Calculated density                | <i>Z</i> = 2, <i>D</i> <sub>c</sub> = 1.599 g/cm <sup>3</sup>                                                                                                                               |
| Absorption coefficient                       | $\mu$ = 5.761 mm <sup>-1</sup>                                                                                                                                                              |
| <i>F</i> (000)                               | <i>F</i> 000 = 648                                                                                                                                                                          |
| Absorption correction                        | Multi scan                                                                                                                                                                                  |
| Final GooF                                   | 1.192                                                                                                                                                                                       |
| Final R indices [ <i>I</i> > 2σ( <i>I</i> )] | R1=0.0640 (3624), wR2=0.2408 (4826)                                                                                                                                                         |
| Largest diff. peak and hole                  | 0.936 Å                                                                                                                                                                                     |

**Table 1:** In vitro cytotoxicity of compounds B1 to B15 against human cancer cell lines.

IC<sub>50</sub> values<sup>a</sup>(in  $\mu$ M) for compounds in selected human cancer cell lines

| <b>Compounds</b>   | <b>HT-29</b><br>Human colon<br>cancer | <b>DU-145</b><br>Human prostate<br>cancer | <b>A549</b><br>Human lung<br>cancer | <b>MDA MB-231</b><br>human breast<br>cancer |
|--------------------|---------------------------------------|-------------------------------------------|-------------------------------------|---------------------------------------------|
| B1                 | NA                                    | NA                                        | NA                                  | NA                                          |
| B2                 | 63.09                                 | 36.54                                     | 12.73                               | 42.30                                       |
| B3                 | NA                                    | NA                                        | NA                                  | NA                                          |
| B4                 | 37.78                                 | 18.19                                     | 15.84                               | 30.19                                       |
| B5                 | NA                                    | NA                                        | NA                                  | NA                                          |
| B6                 | NA                                    | 56.11                                     | 31.13                               | NA                                          |
| B7                 | 54.12                                 | 27.20                                     | 18.89                               | 32.35                                       |
| B8                 | NA                                    | NA                                        | NA                                  | NA                                          |
| B9                 | 19.54                                 | 9.332                                     | 3.890                               | 12.02                                       |
| B10                | 16.12                                 | 7.595                                     | 2.798                               | 7.795                                       |
| B11                | 66.06                                 | 26.00                                     | 16.59                               | 38.01                                       |
| B12                | 63.67                                 | 44.73                                     | 27.26                               | 77.62                                       |
| B13                | 17.63                                 | 7.780                                     | 3.140                               | 8.016                                       |
| B14                | 33.76                                 | 10.39                                     | 8.912                               | 13.48                                       |
| B15                | 19.05                                 | 9.354                                     | 7.079                               | 14.65                                       |
| <b>Doxorubicin</b> | 1.995                                 | 1.723                                     | 1.750                               | 0.987                                       |

<sup>a</sup> 50% Inhibitory concentration after 48 h of drug treatment and the values are average of three individual experiments.

<sup>b</sup> Human colon cancer.

<sup>c</sup> Human prostate cancer.

<sup>d</sup> Human lung cancer.

<sup>e</sup> human breast cancer.

NA-means not active and having IC<sub>50</sub> >100  $\mu$ M
